# Supplementary material for: Synthesis and Bioactivity of Ancorinoside B, a Marine Diglycosyl Tetramic Acid
Source: MDPI journal article supplement (doi:10.3390/md19100583), 2021-10-19
Supplement: s1 [file s1]

# Synthesis and Bioactivity of Ancorinoside B, a Marine Diglycosyl Tetramic Acid

Kevin J. Soliga, Sofia I. Bär, Natalie Oberhuber, Haoxuan Zeng, Hedda Schrey and Rainer Schobert\*

Rainer.Schobert@uni-bayreuth.de

| Table of content                                                                                                                                        | Page   |
|---------------------------------------------------------------------------------------------------------------------------------------------------------|--------|
| <b>Table S1:</b> NMR-Comparison of isolated and synthetic ancorinoside B tris(diethylammonium) salt $[\text{NEt}_2\text{H}_2]_3^+ [\mathbf{2-3H}]^{3-}$ | S2     |
| NMR spectra and HPLC chromatograms                                                                                                                      | S3-S28 |
| HRMS spectra and chromatograms of key compounds <b>2</b> , <b>8</b> , <b>6</b> , and <b>5</b>                                                           | S29    |
| <b>Figure S1:</b> images of gelatin gels                                                                                                                | S33    |

## NMR-Comparison of isolated and synthetic Ancorinoside B tris(diethylammonium) salt

**Table S1.** Comparison of  $^{13}\text{C}$  and  $^1\text{H}$  NMR shifts of isolated and synthetic Ancorinoside B tris(diethylammonium) salt

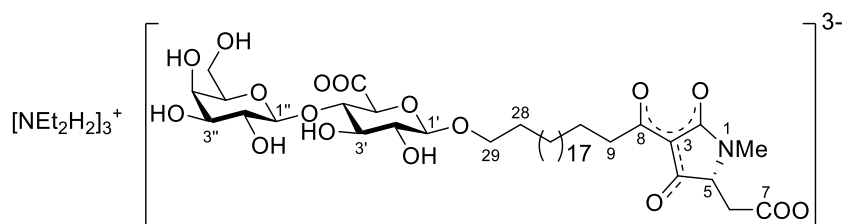

| Pos.                                   | natural $[\text{NEt}_2\text{H}_2]^+_3[\mathbf{2-3H}]^{3-}$ in $\text{CD}_3\text{OD}^7$ |                                               | synthetic $[\text{NEt}_2\text{H}_2]^+_3[\mathbf{2-3H}]^{3-}$ in $\text{CD}_3\text{OD}$ |                                        |
|----------------------------------------|----------------------------------------------------------------------------------------|-----------------------------------------------|----------------------------------------------------------------------------------------|----------------------------------------|
|                                        | $\delta_{\text{C}}$                                                                    | $\delta_{\text{H}}$ (mult., J [Hz])           | $\delta_{\text{C}}$                                                                    | $\delta_{\text{H}}$ (mult., J [Hz])    |
| 2                                      | 175.7                                                                                  |                                               | 176.1                                                                                  |                                        |
| 3                                      | 102.3                                                                                  |                                               | 102.4                                                                                  |                                        |
| 4                                      | 195.7                                                                                  |                                               | 196.7                                                                                  |                                        |
| 5                                      | 63.6                                                                                   | 3.88 (dd, 8.1, 4.2)                           | 64.7                                                                                   | 3.90-3.95 (m)                          |
| 6                                      | 39.1                                                                                   | 2.78 (dd, 16.2, 4.2),<br>2.37 (dd, 16.2, 8.1) | 41.7                                                                                   | 2.76-2.80 (m),<br>2.13 (dd, 15.3, 9.2) |
| 7                                      | 177.1                                                                                  |                                               | 179.9                                                                                  |                                        |
| 8                                      | 197.0                                                                                  |                                               | 197.8                                                                                  |                                        |
| 9                                      | 40.5                                                                                   | 2.78 (m),<br>2.73 (m)                         | 41.1                                                                                   | 2.80-2.84 (m),<br>2.70-2.76 (m)        |
| 10                                     | 27.3                                                                                   | 1.55 (quin, 7.3)                              | 27.6                                                                                   | 1.51-1.58 (m)                          |
| 11                                     | 30.8                                                                                   | 1.32 (m)                                      | 31.0                                                                                   | 1.24-1.43 (m)                          |
| 12-26                                  | 30.8                                                                                   | 1.27 (m)                                      | 31.0                                                                                   | 1.24-1.43 (m)                          |
| 27                                     | 27.2                                                                                   | 1.36 (m)                                      | 27.3                                                                                   | 1.24-1.43 (m)                          |
| 28                                     | 30.8                                                                                   | 1.60 (quin, 7.3)                              | 30.9                                                                                   | 1.58-1.66 (m)                          |
| 29                                     | 71.0                                                                                   | 3.88 (m),<br>3.51 (m)                         | 71.2                                                                                   | 3.82-3.89 (m),<br>3.52-3.54 (m)        |
| NMe                                    | 27.4                                                                                   | 2.88 (s)                                      | 27.8                                                                                   | 2.91 (s)                               |
| 1'                                     | 104.2                                                                                  | 4.29 (d, 7.7)                                 | 104.3                                                                                  | 4.30 (d, 7.9)                          |
| 2'                                     | 74.6                                                                                   | 3.28 (t, 8.1)                                 | 74.7                                                                                   | 3.27-3.29 (m)                          |
| 3'                                     | 76.7                                                                                   | 3.50 (t, 8.9)                                 | 76.8                                                                                   | 3.49-3.52 (m)                          |
| 4'                                     | 83.5                                                                                   | 3.59 (t, 9.2)                                 | 83.6                                                                                   | 3.59-3.62 (m)                          |
| 5'                                     | 77.2                                                                                   | 3.72 (d, 9.6)                                 | 77.3                                                                                   | 3.69-3.73 (m)                          |
| 6'                                     | 176.2                                                                                  |                                               | 176.5                                                                                  |                                        |
| 1''                                    | 105.5                                                                                  | 4.35 (d, 7.7)                                 | 105.6                                                                                  | 4.35 (d, 7.3)                          |
| 2''                                    | 72.7                                                                                   | 3.53 (dd, 10.0, 7.7)                          | 72.8                                                                                   | 3.54-3.56 (m)                          |
| 3''                                    | 75.0                                                                                   | 3.47 (dd, 10.0, 3.8)                          | 75.1                                                                                   | 3.48 (dd, 9.9, 3.5)                    |
| 4''                                    | 70.3                                                                                   | 3.78 (d, 3.8)                                 | 70.4                                                                                   | 3.77-3.79 (m)                          |
| 5''                                    | 77.2                                                                                   | 3.56 (m)                                      | 77.4                                                                                   | 3.56-3.59 (m)                          |
| 6''                                    | 62.5                                                                                   | 3.76 (dd, 11.5, 7.3),<br>3.68 (d, 11.5, 4.6)  | 62.6                                                                                   | 3.73-3.77 (m)<br>3.66-3.69 (m)         |
| $3\text{HN}(\text{CH}_2\text{CH}_3)_2$ | - <sup>a</sup>                                                                         | - <sup>a</sup>                                | 43.6                                                                                   | 3.02 (q, 7.0)                          |
| $3\text{HN}(\text{CH}_2\text{CH}_3)_2$ | - <sup>a</sup>                                                                         | - <sup>a</sup>                                | 11.9                                                                                   | 1.24-1.43 (m)                          |

<sup>a</sup> The literature does not state the shifts of the diethylammonium groups

[7] Fujita, M.; Nakao, Y.; Matsunaga, S.; Seiki, M.; Itoh, Y.; van Soest, R. W. M.; Fusetani, N. Ancorinosides B-D, inhibitors of membrane type 1 matrix metalloproteinase (MT1-MMP), from the marine sponge *Penares sollasi* Thiele. *Tetrahedron* **2001**, *57*, 1229-1234.

# NMR spectra

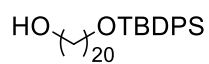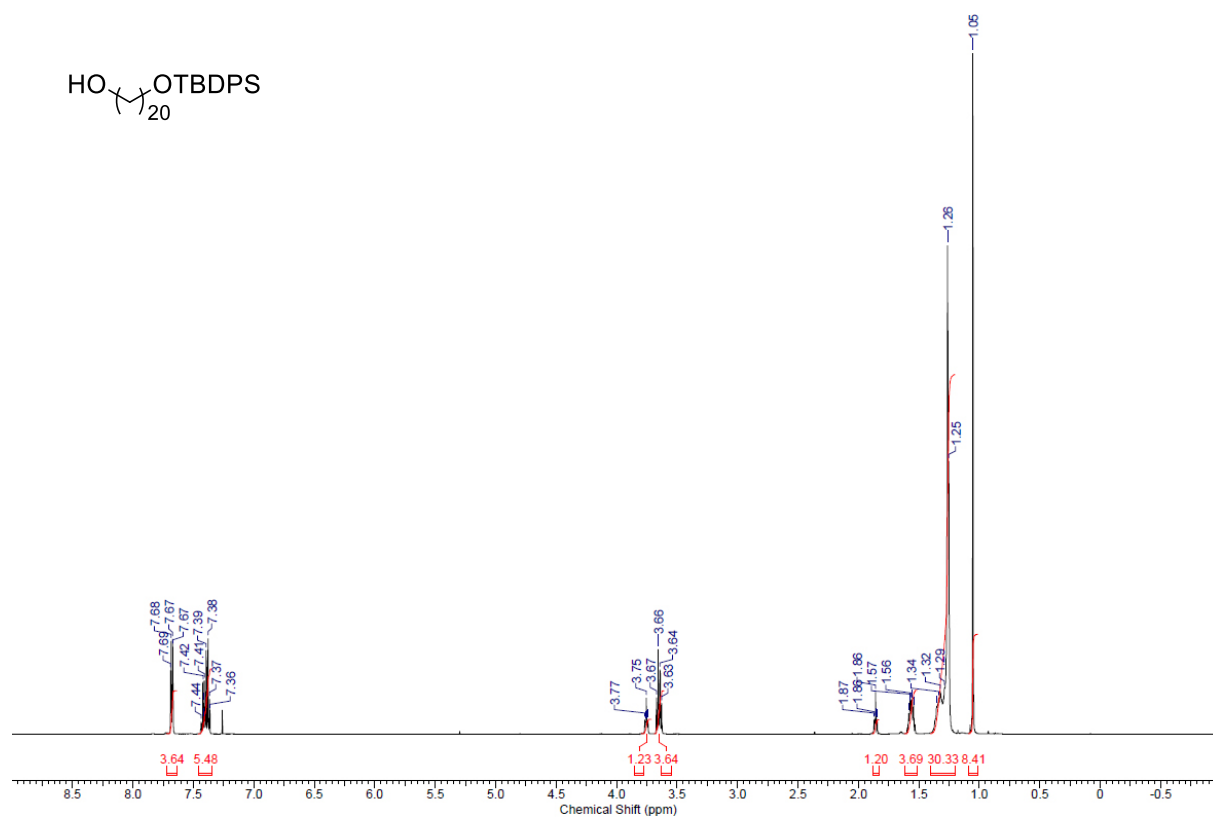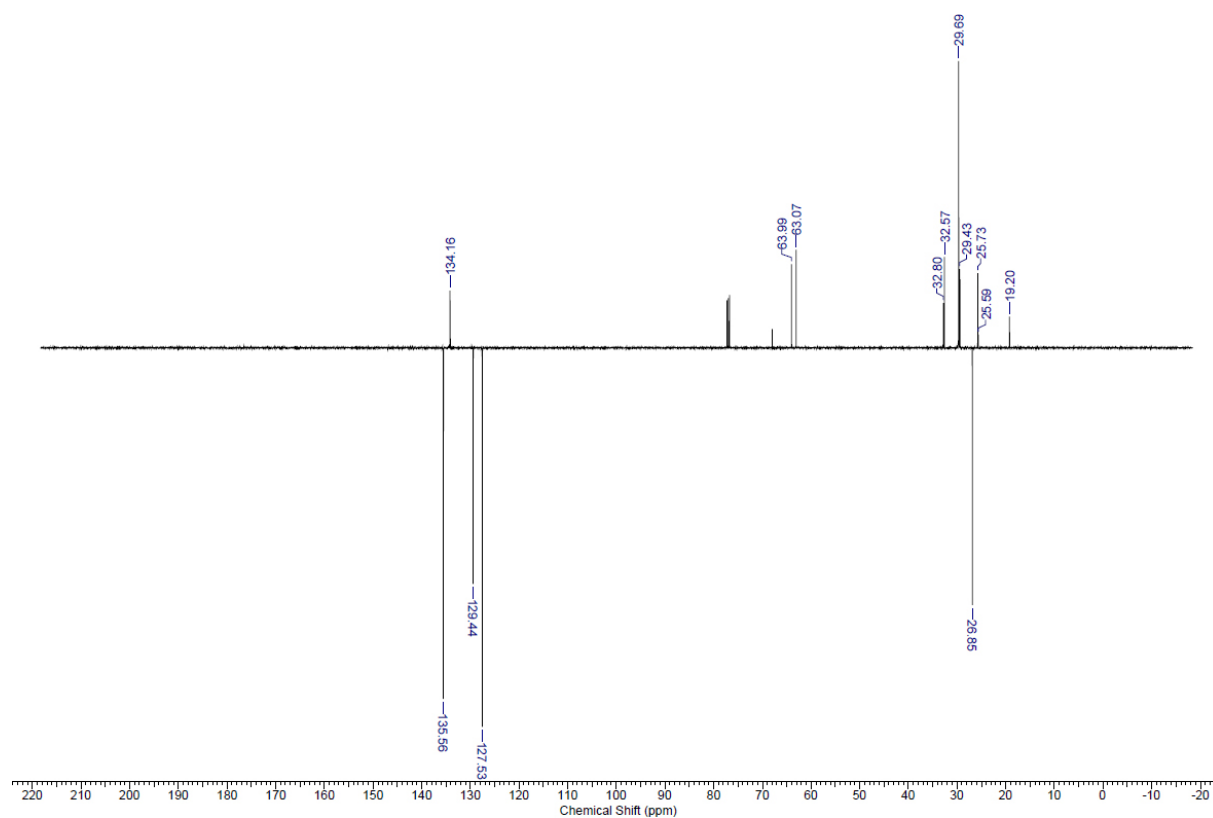

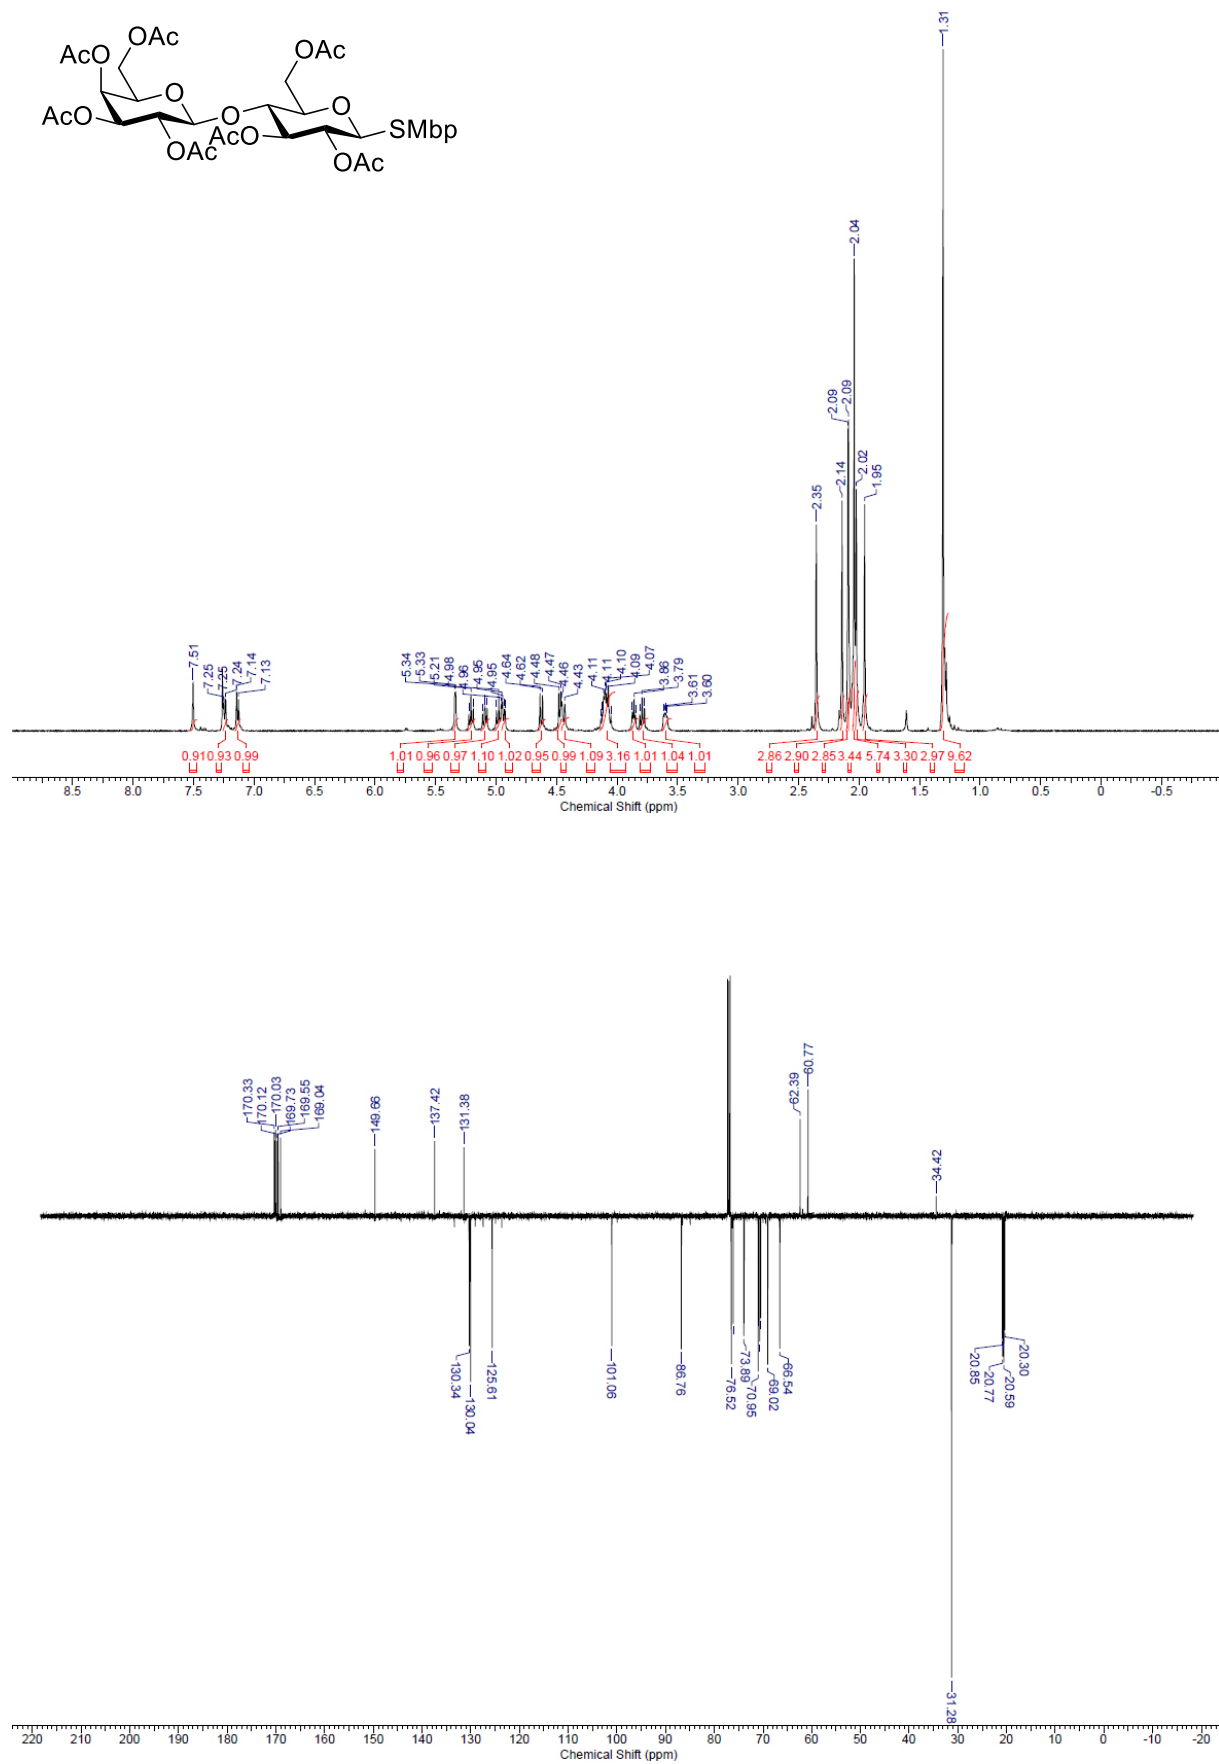

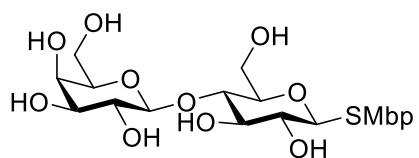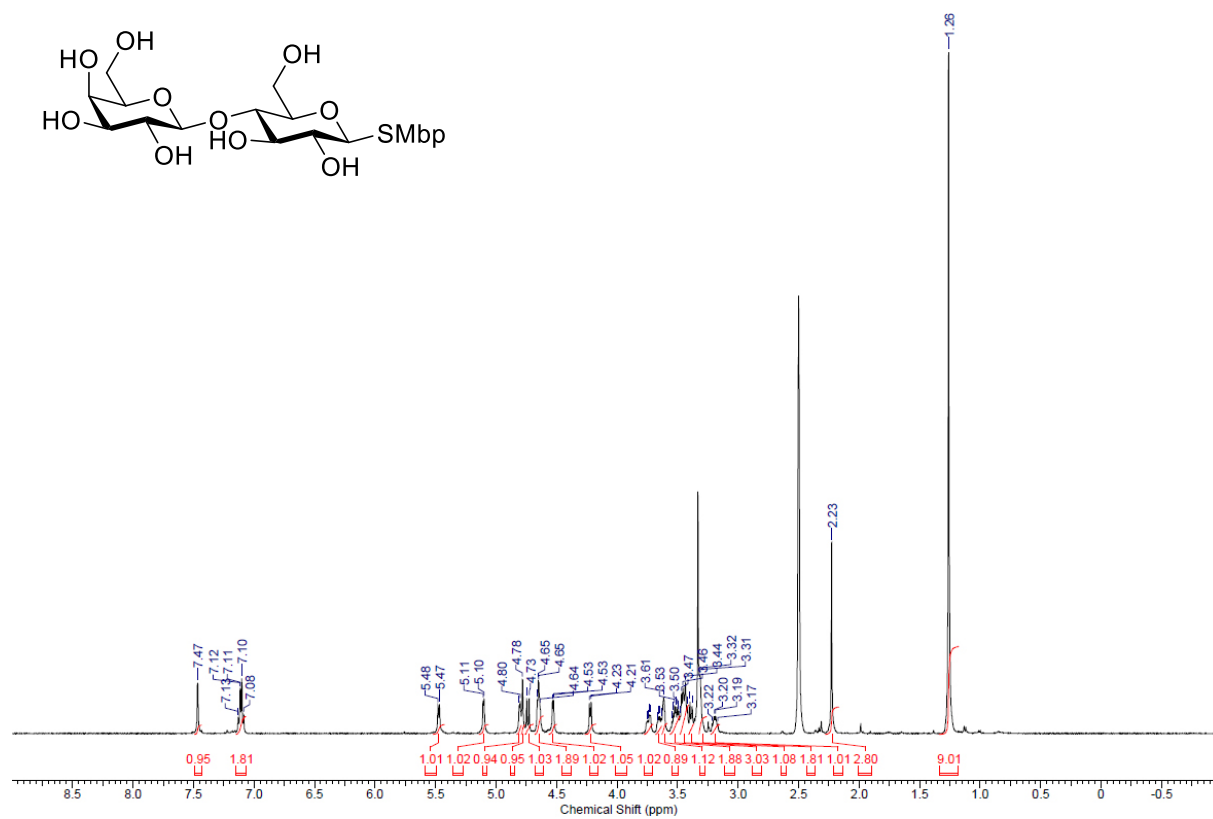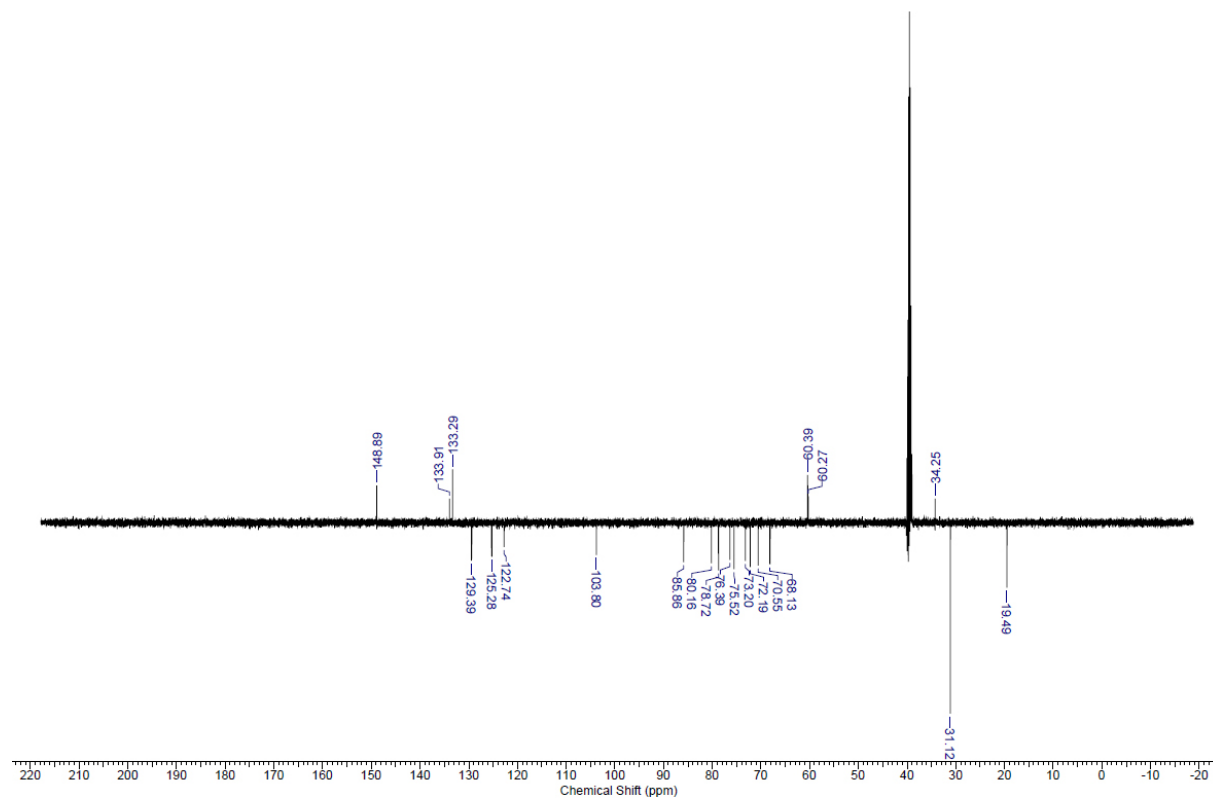

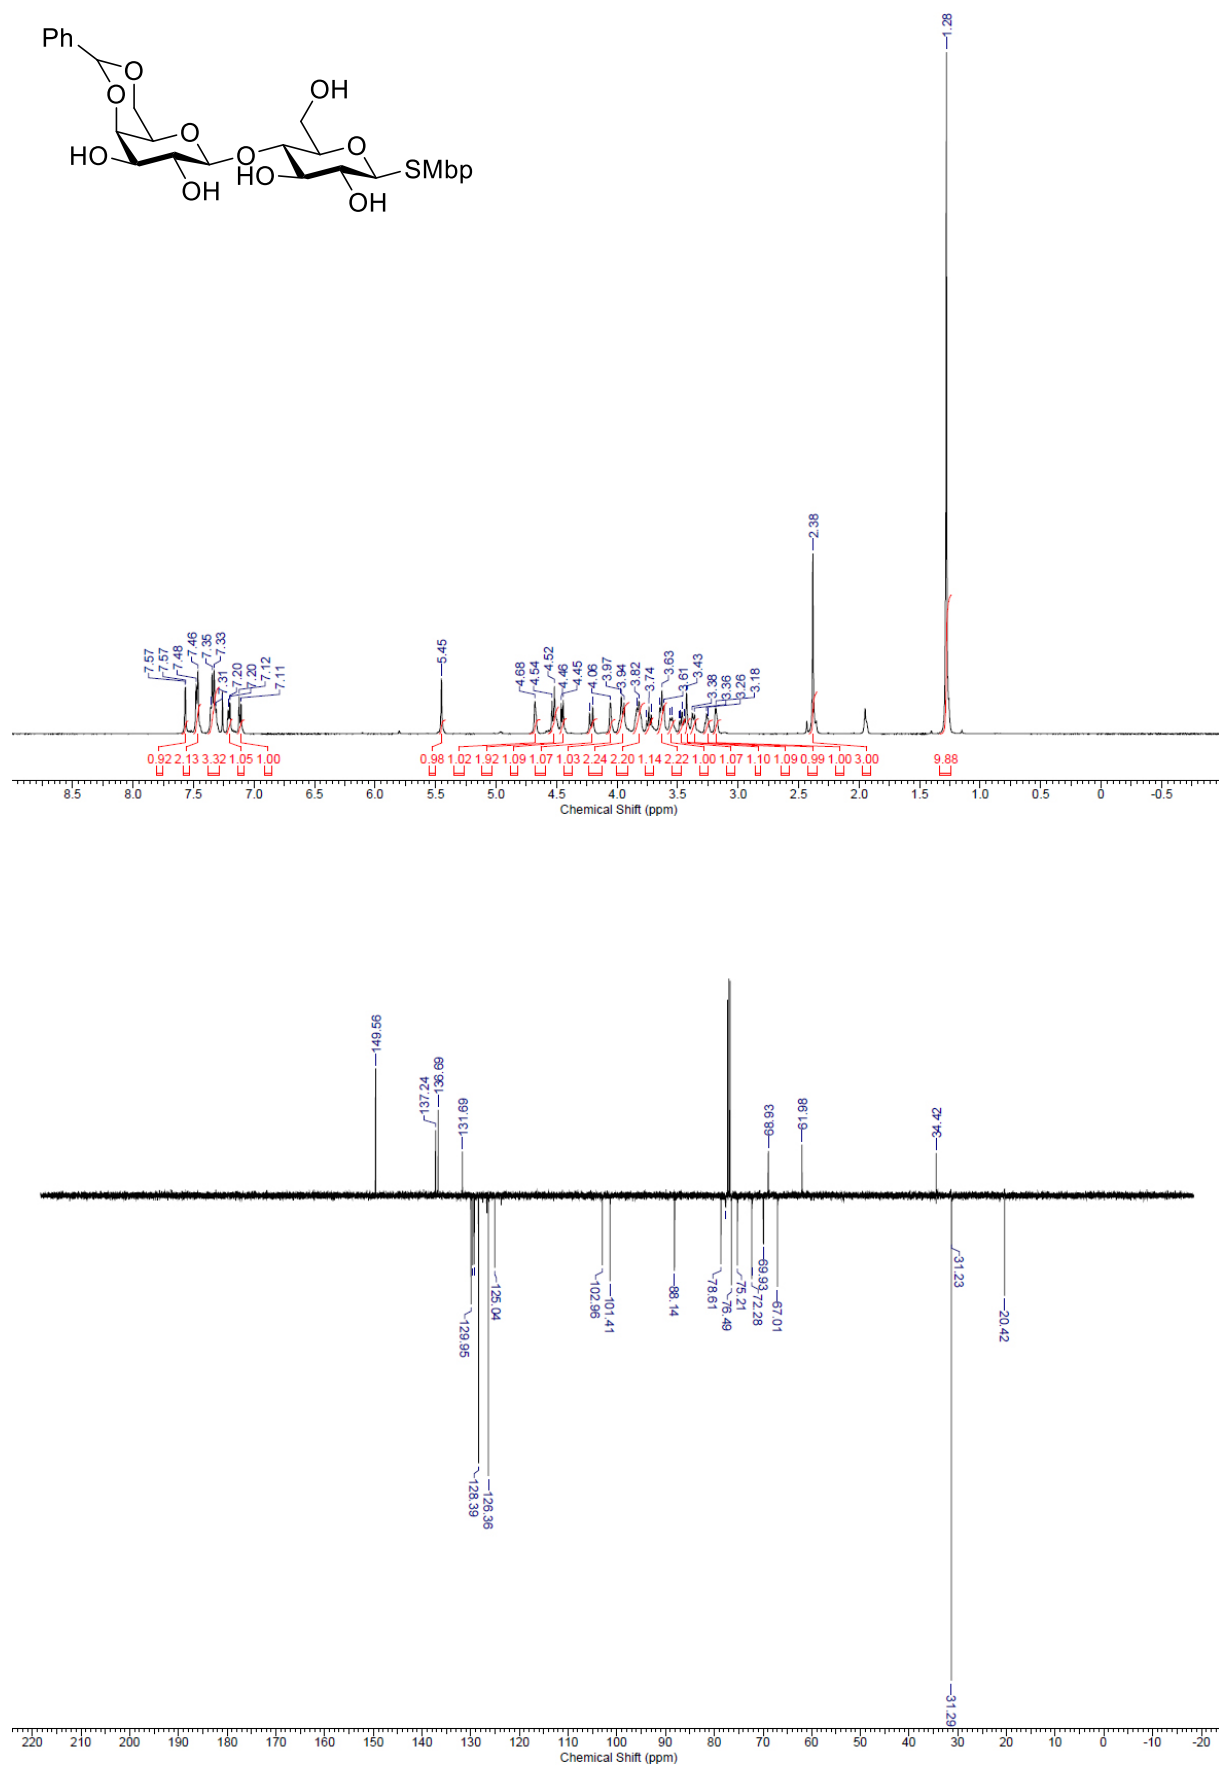

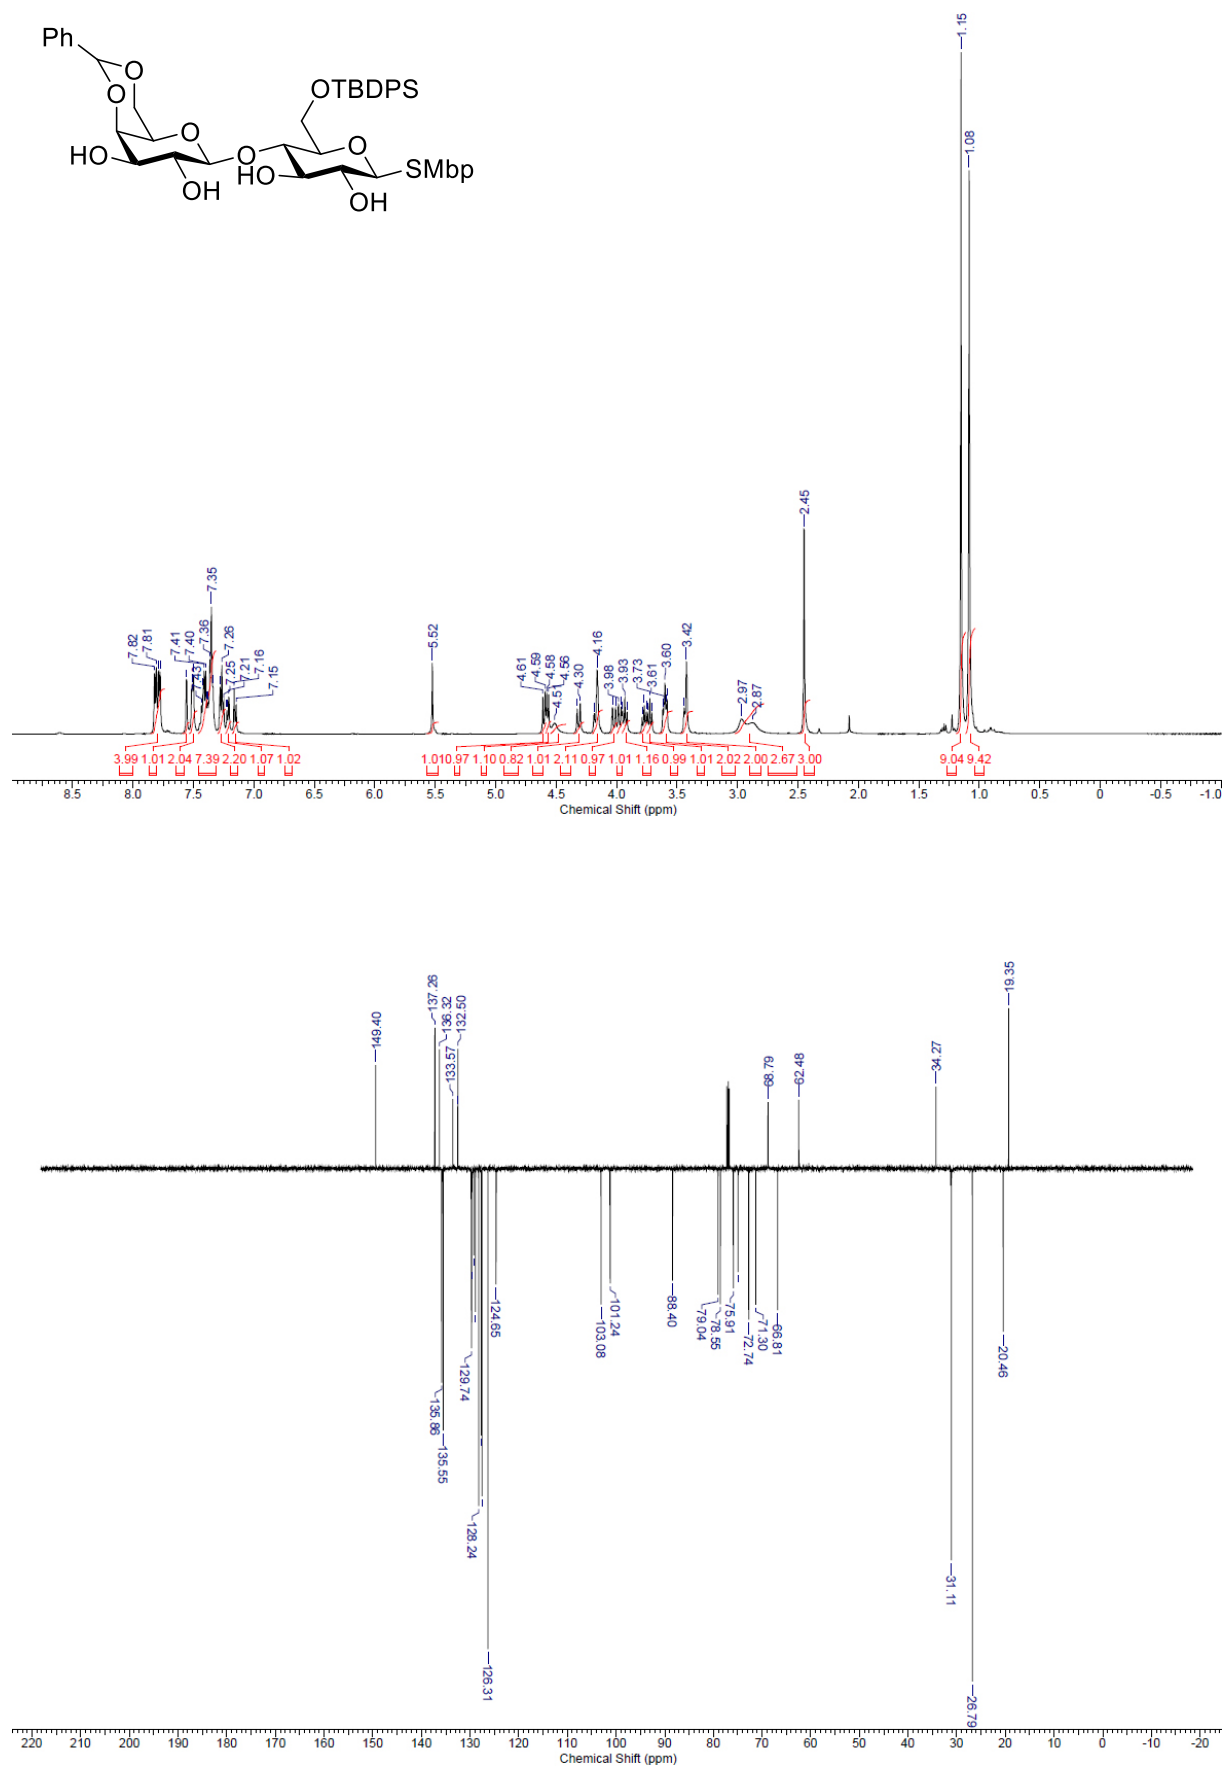

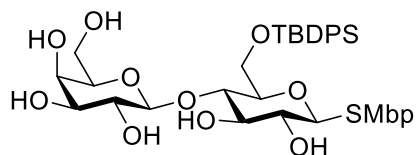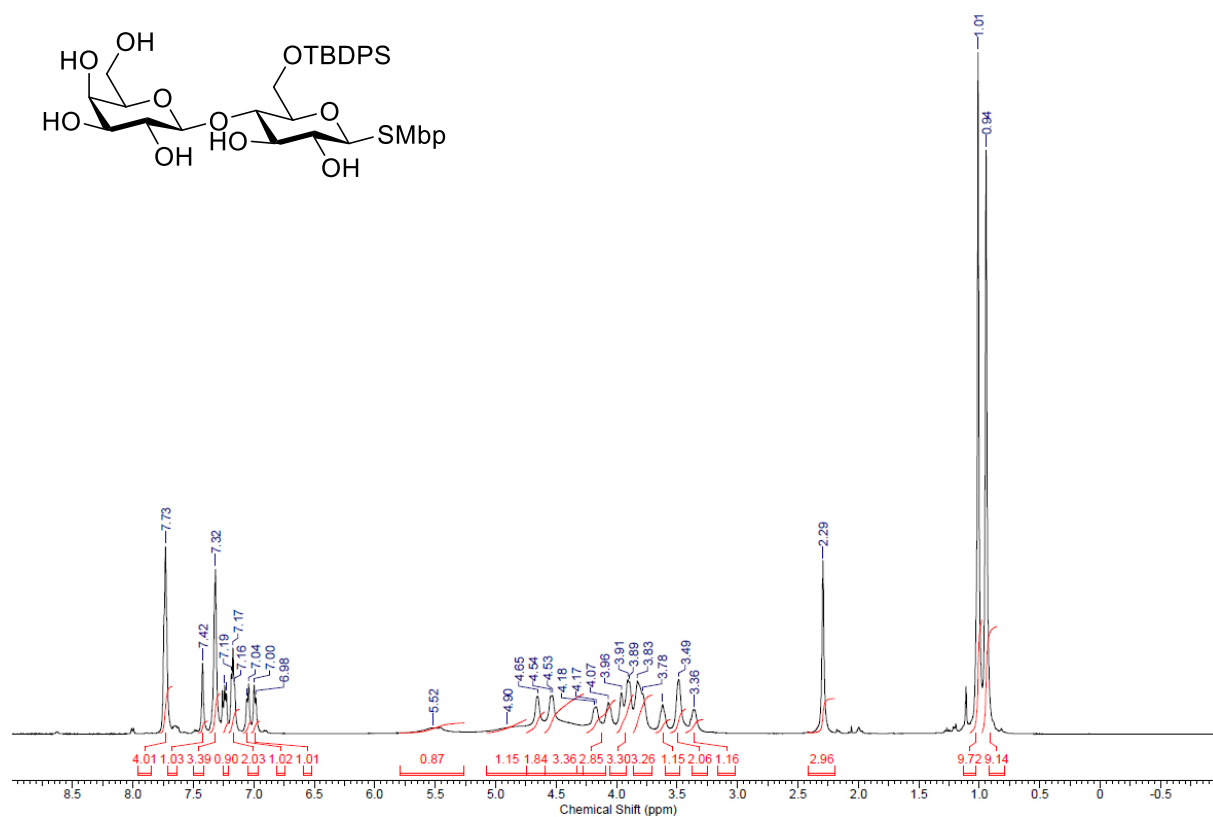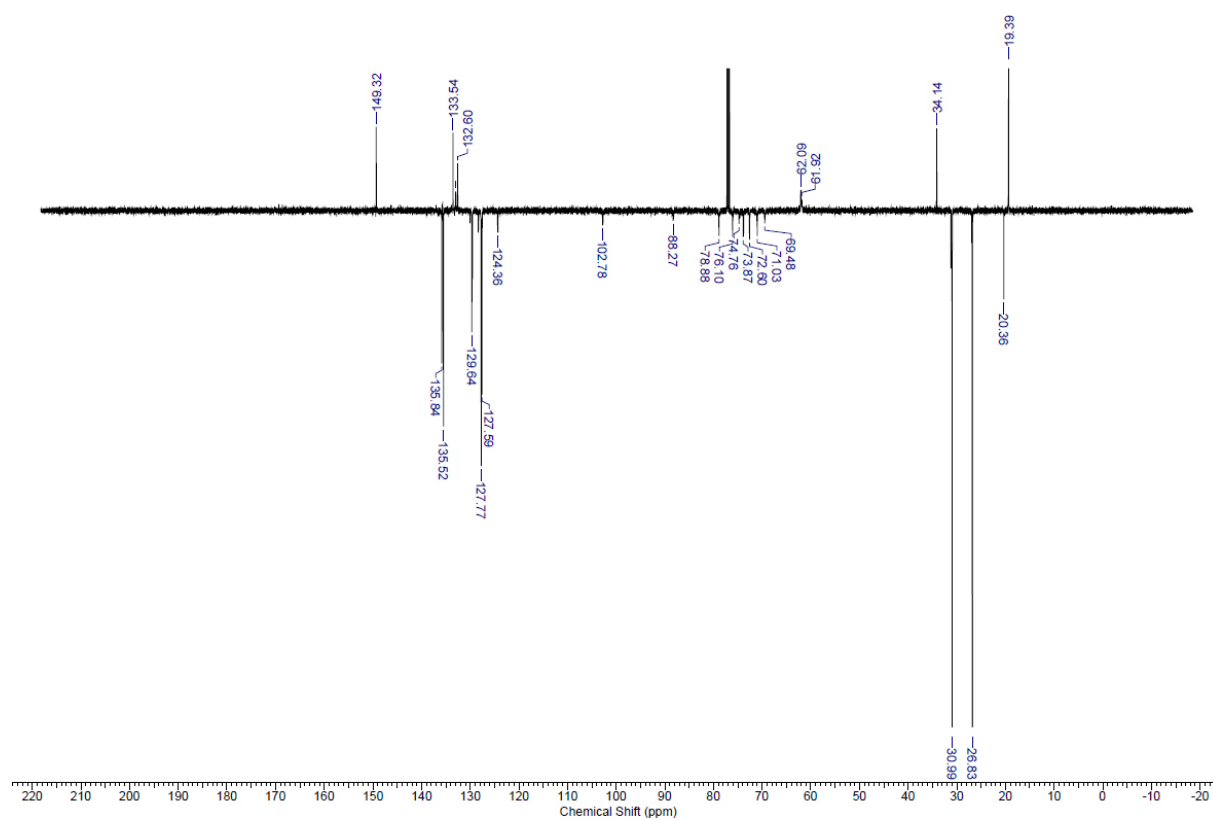



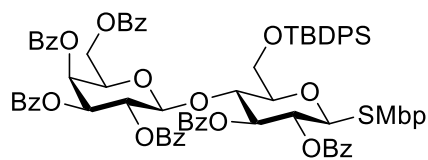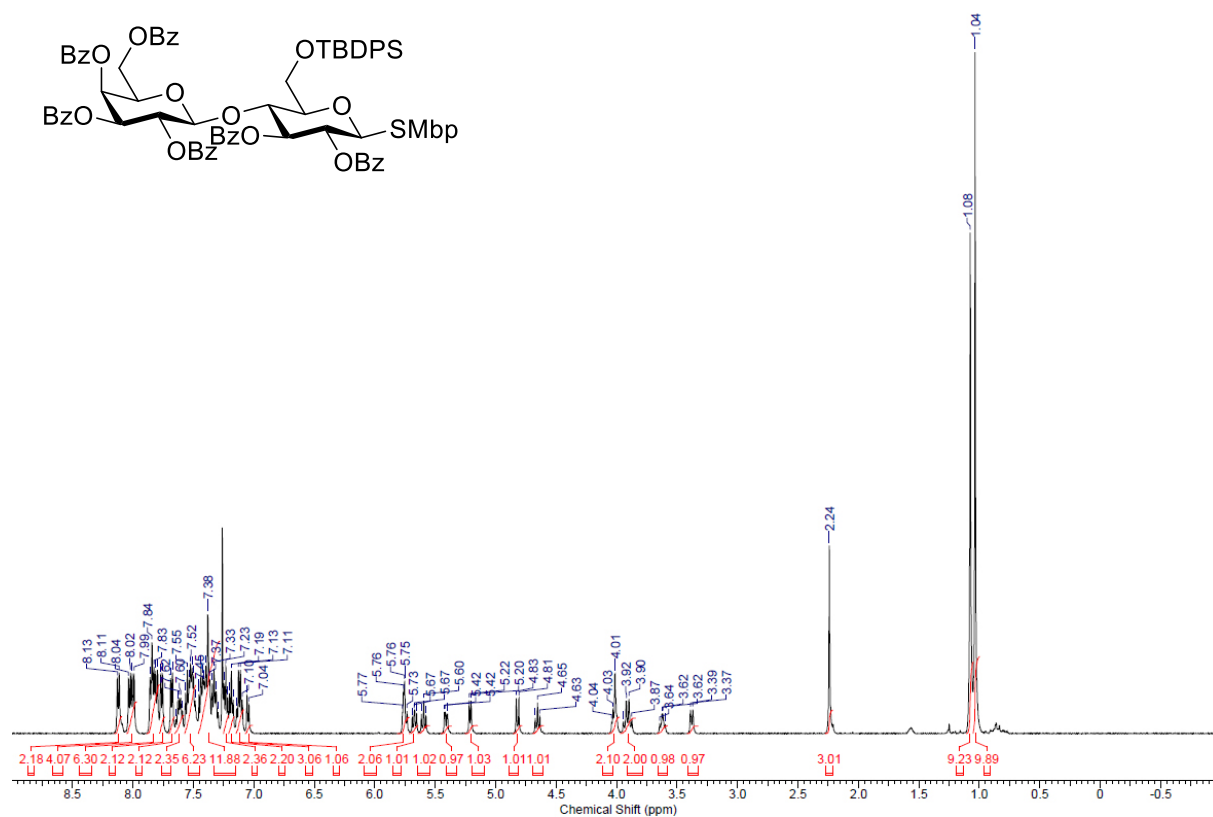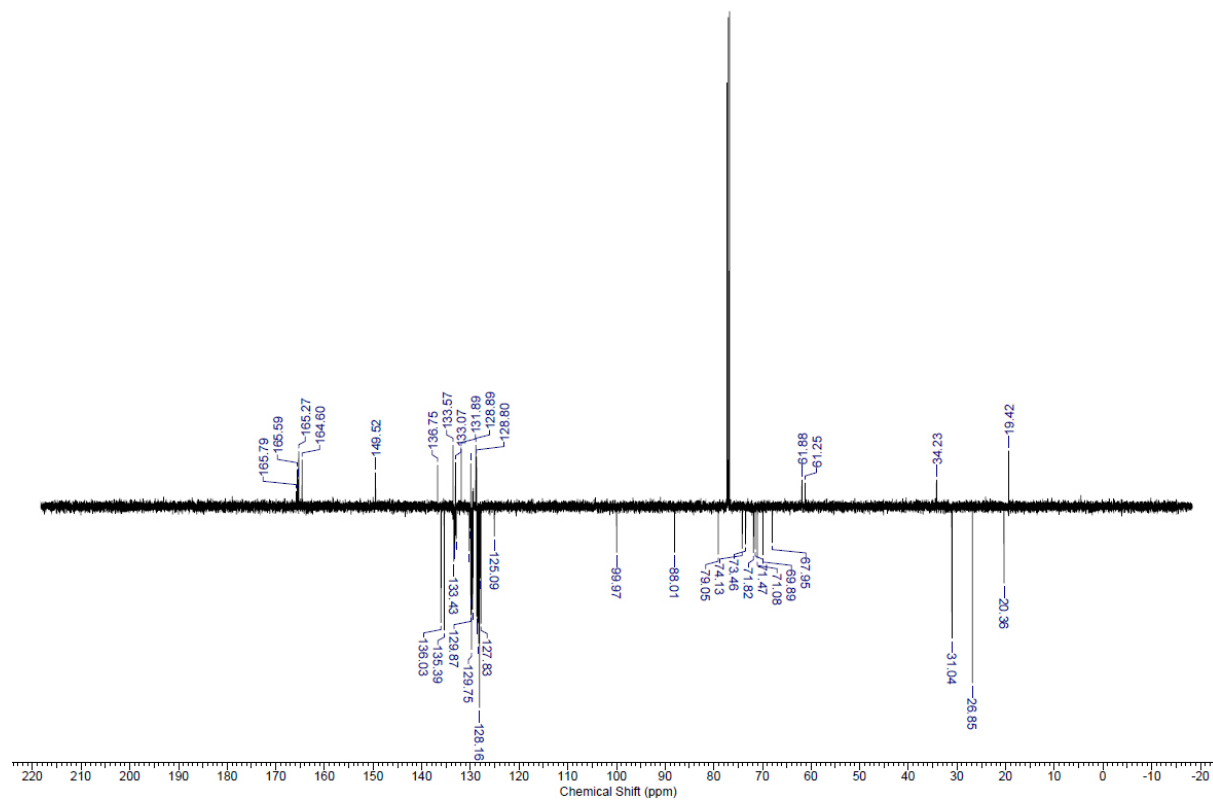

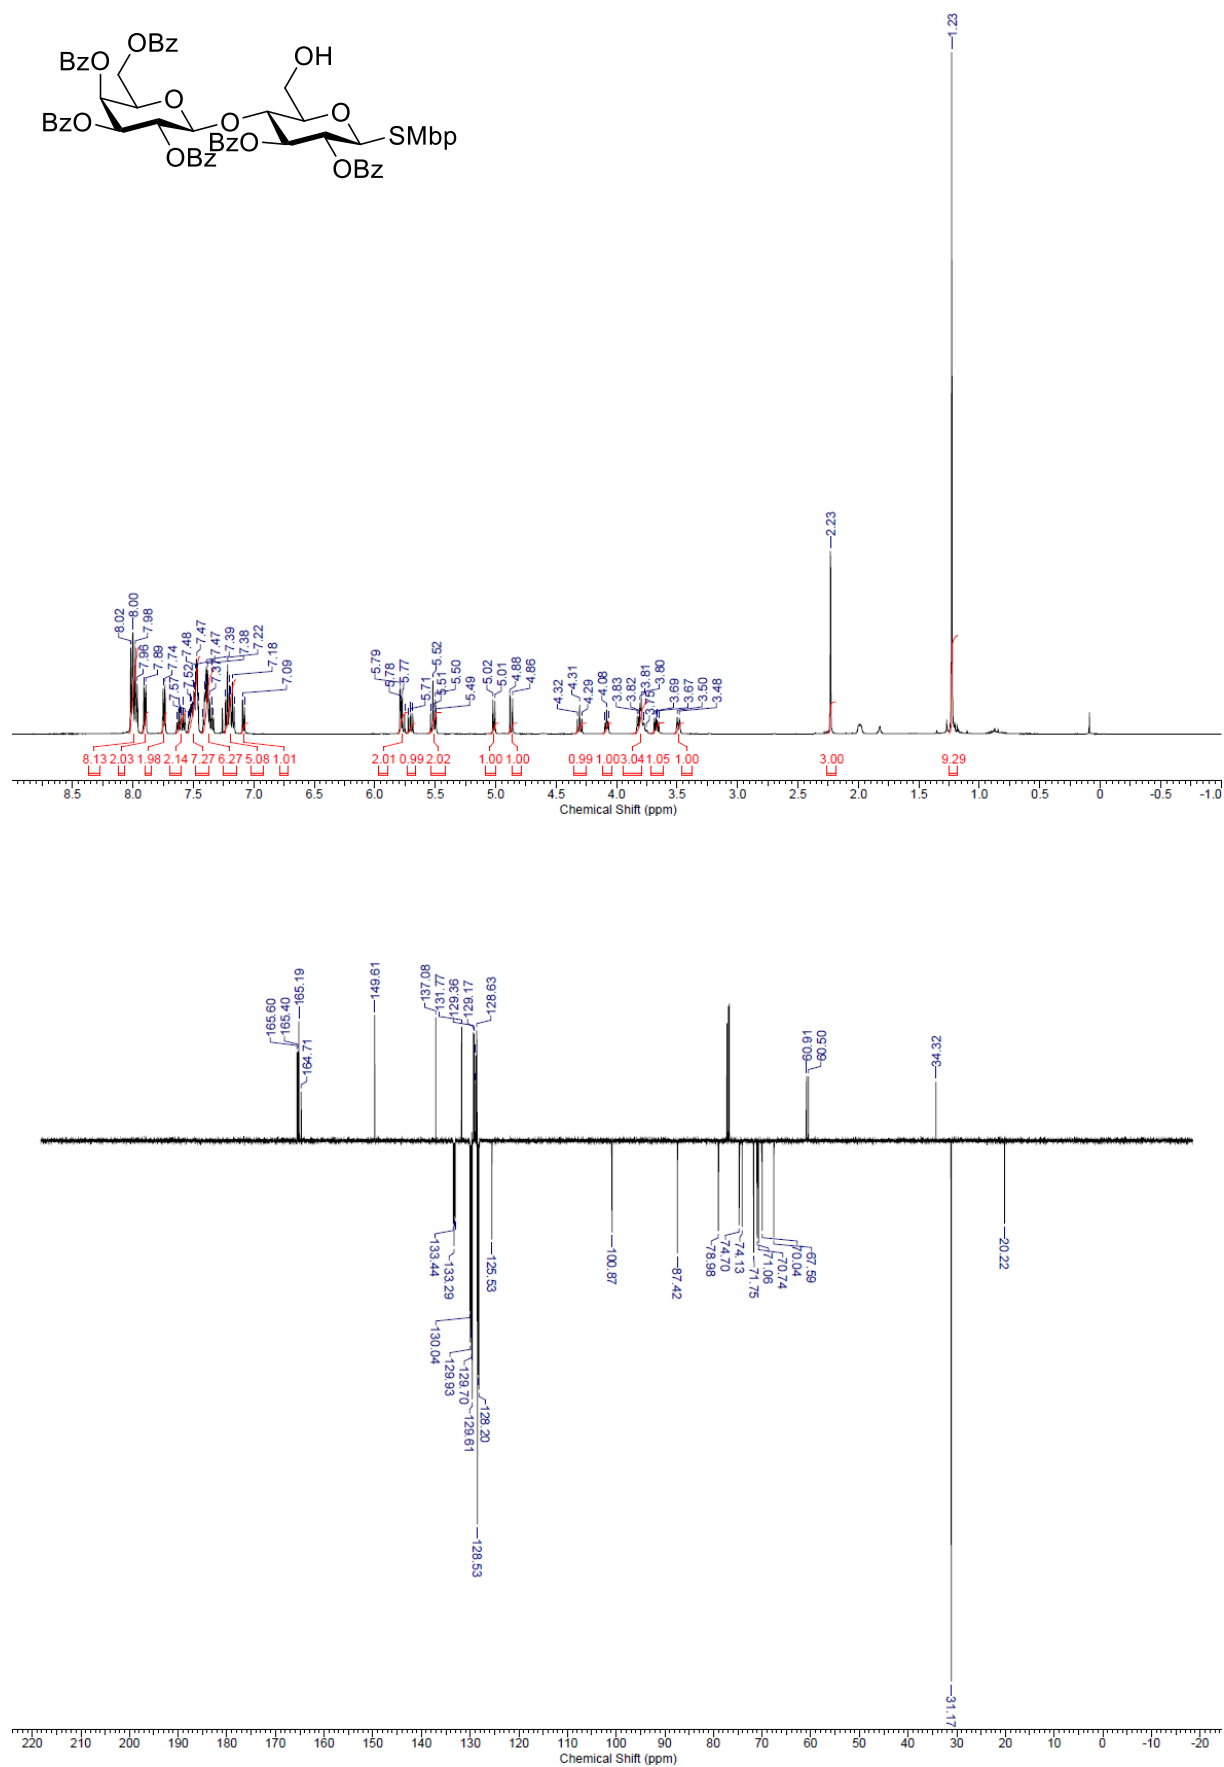

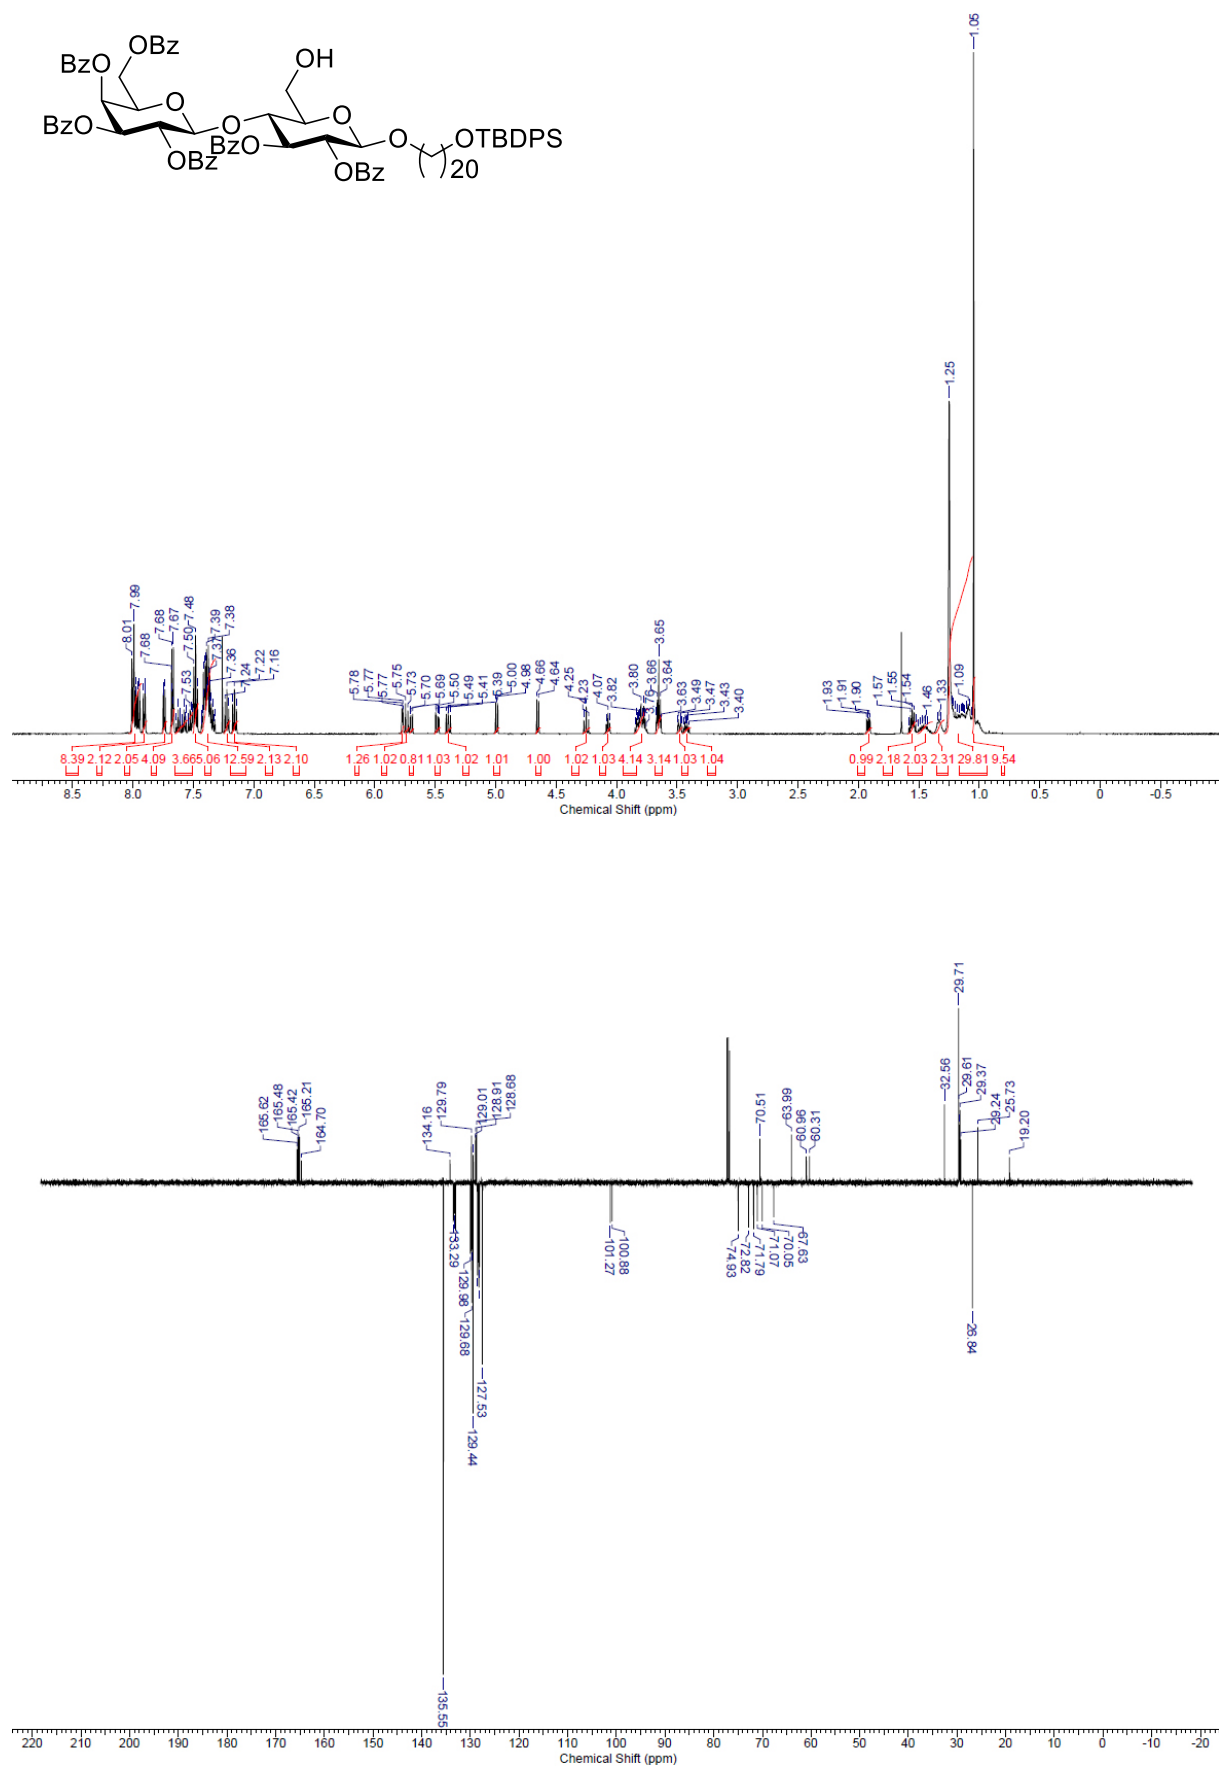

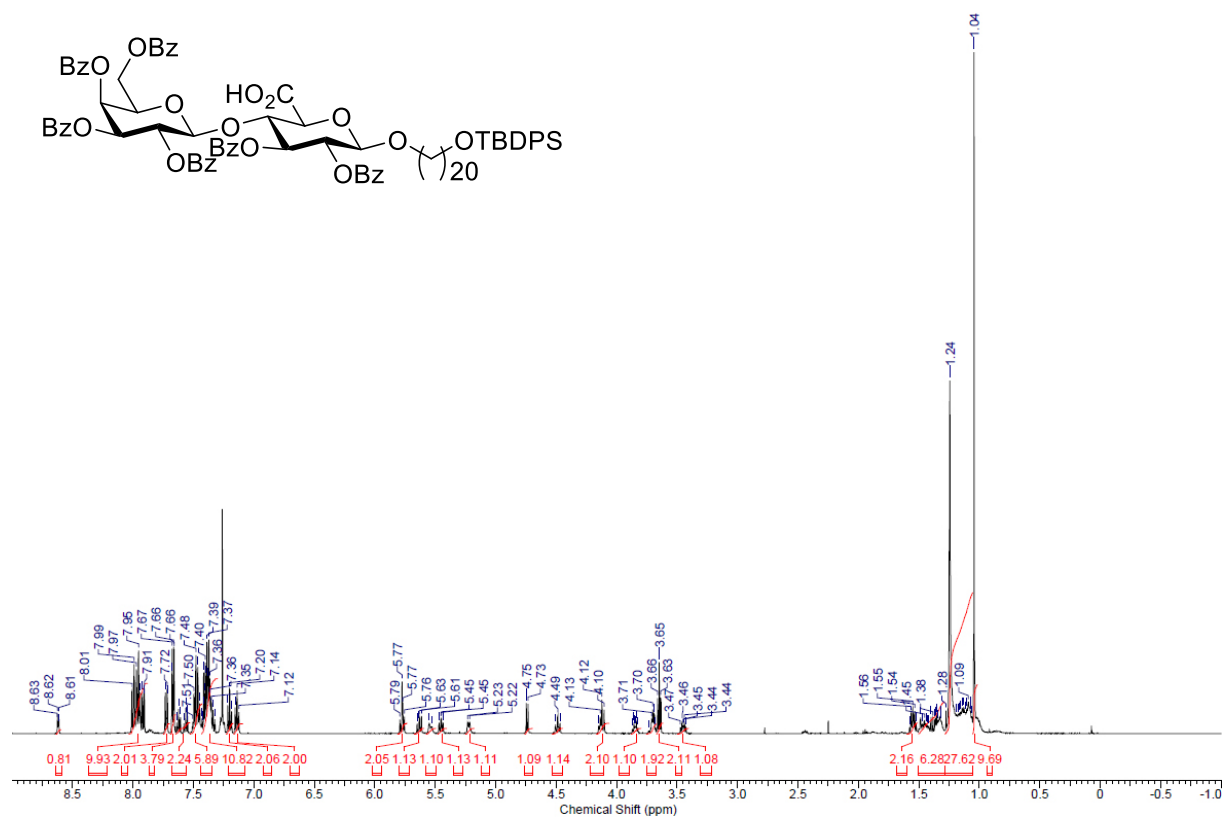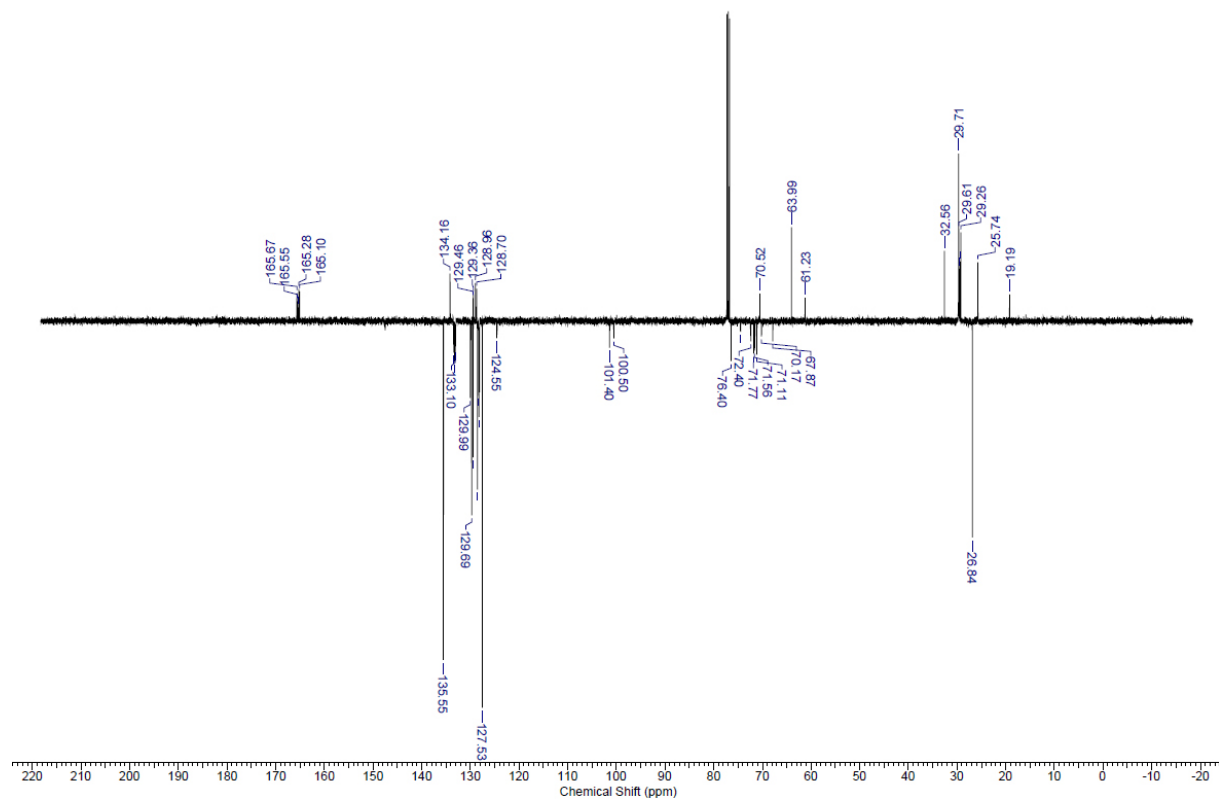

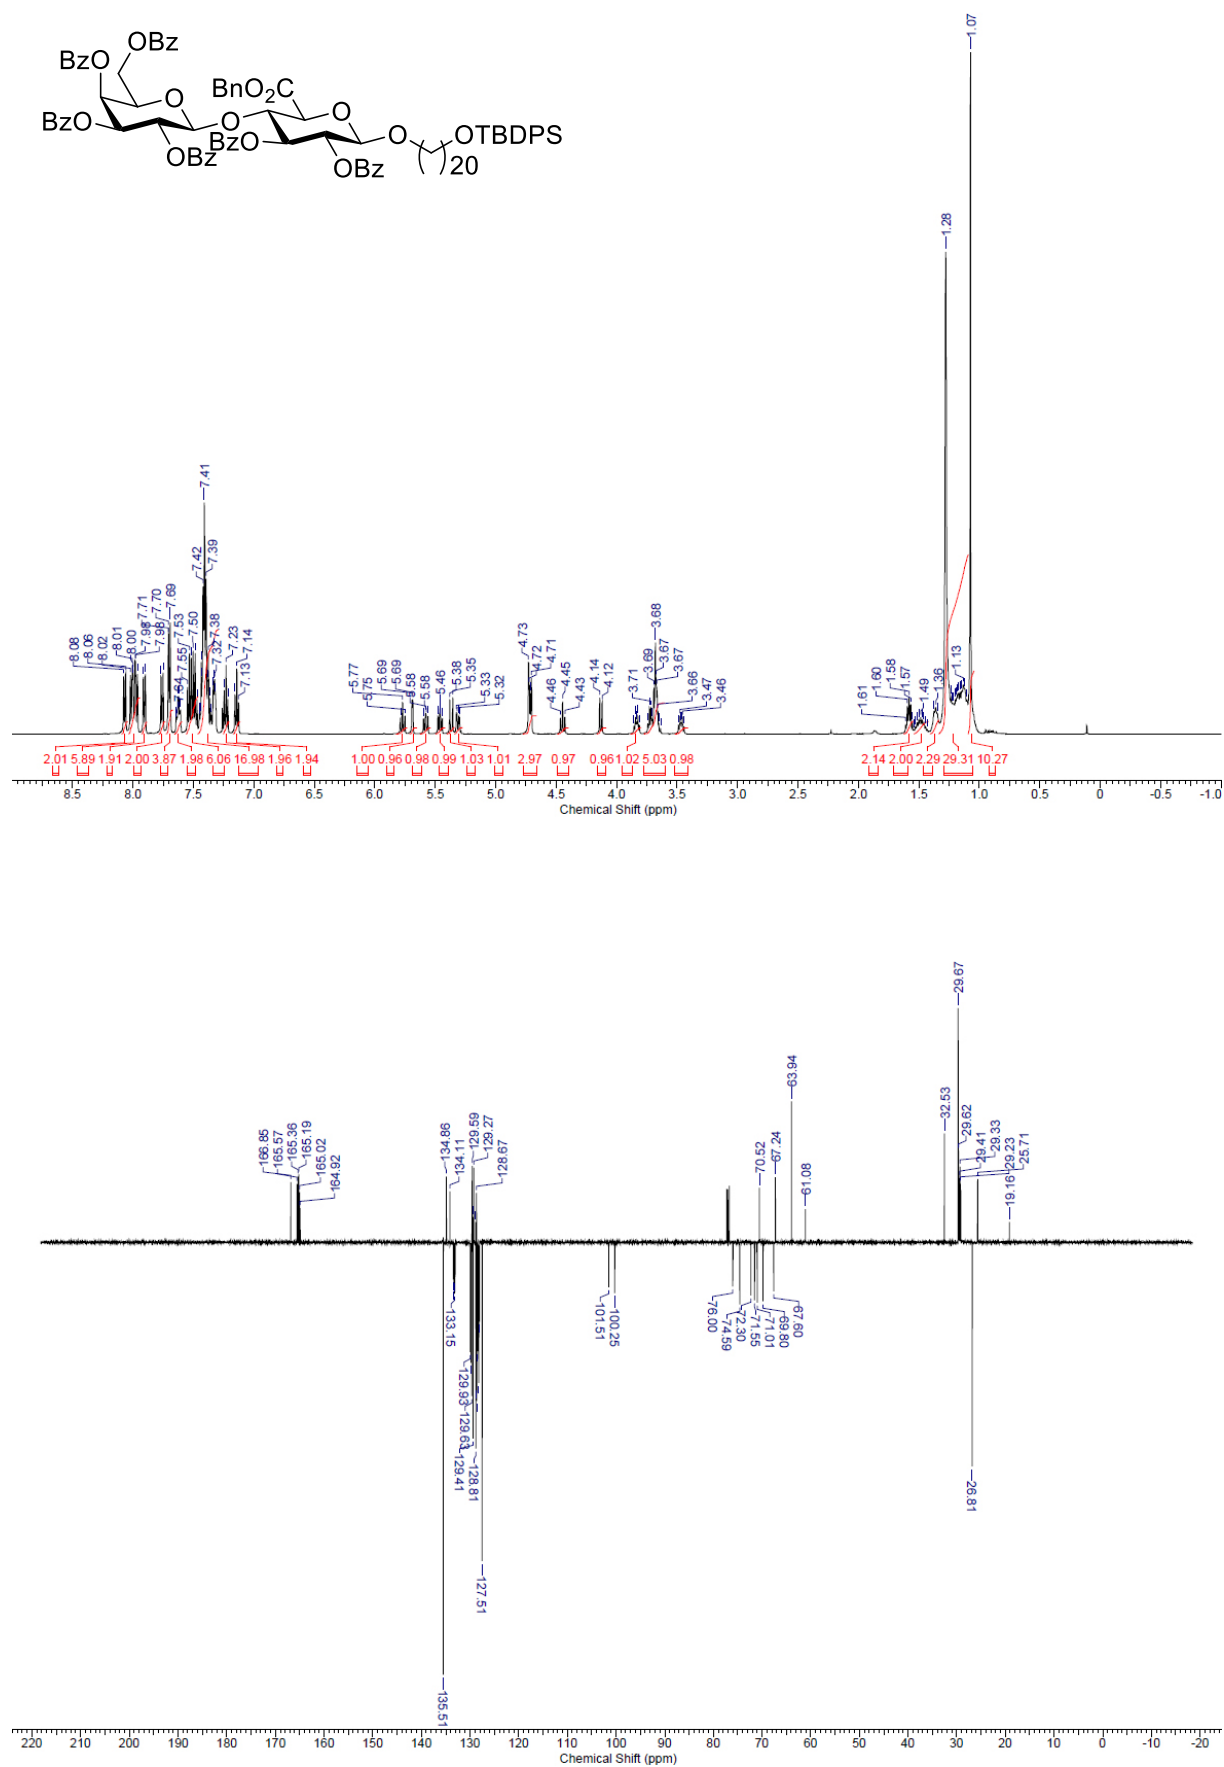

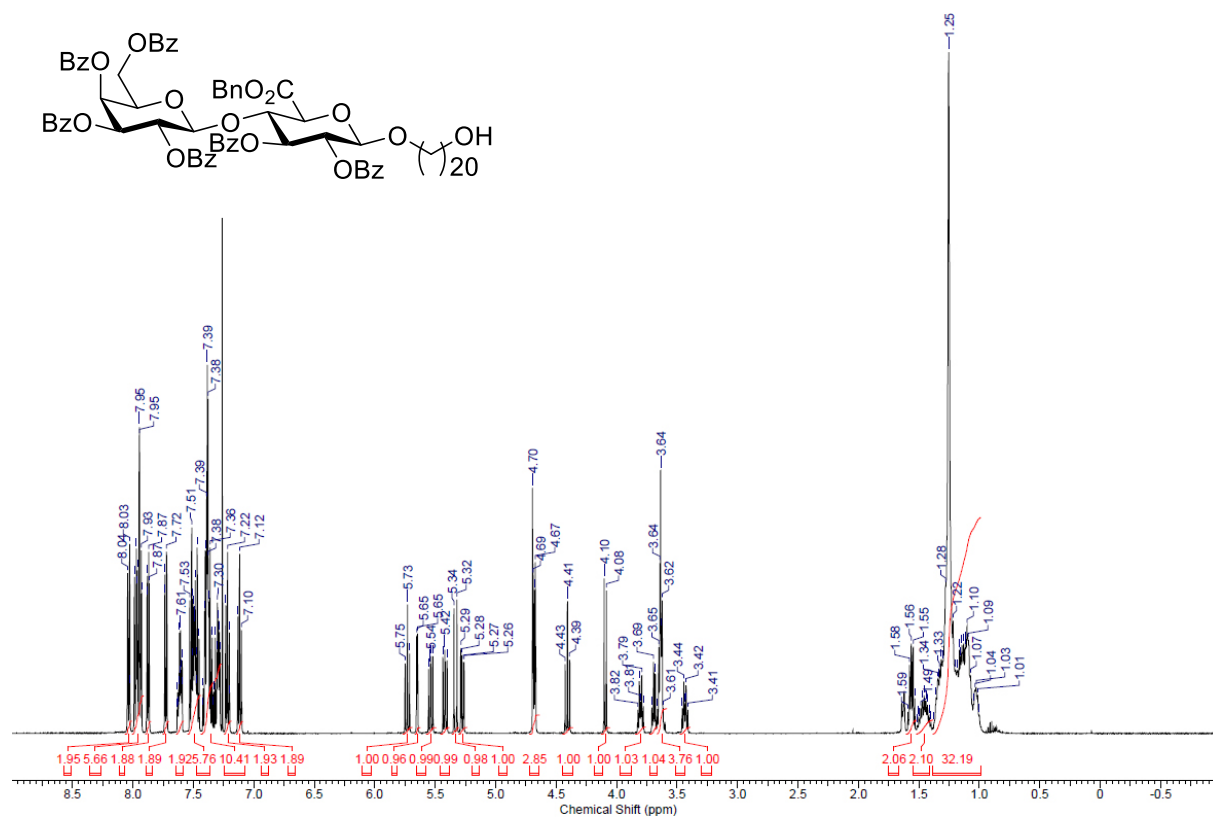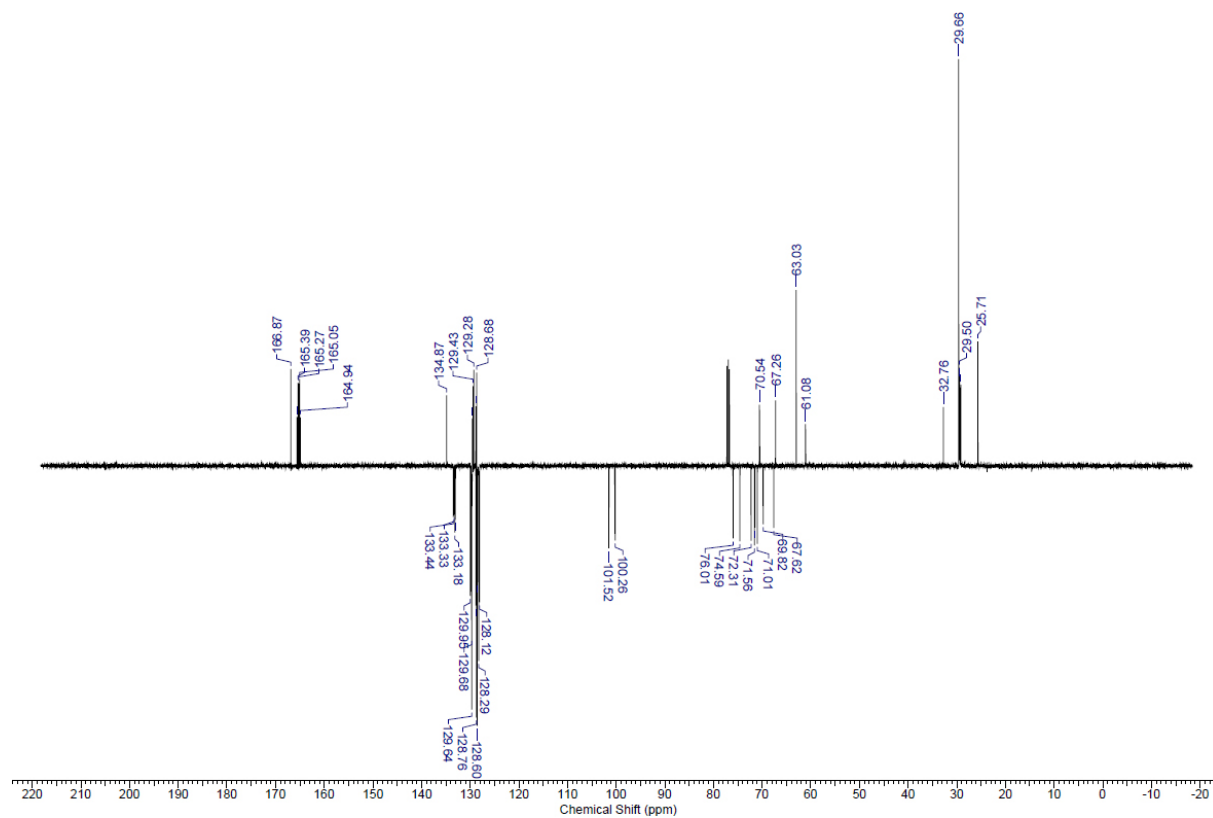

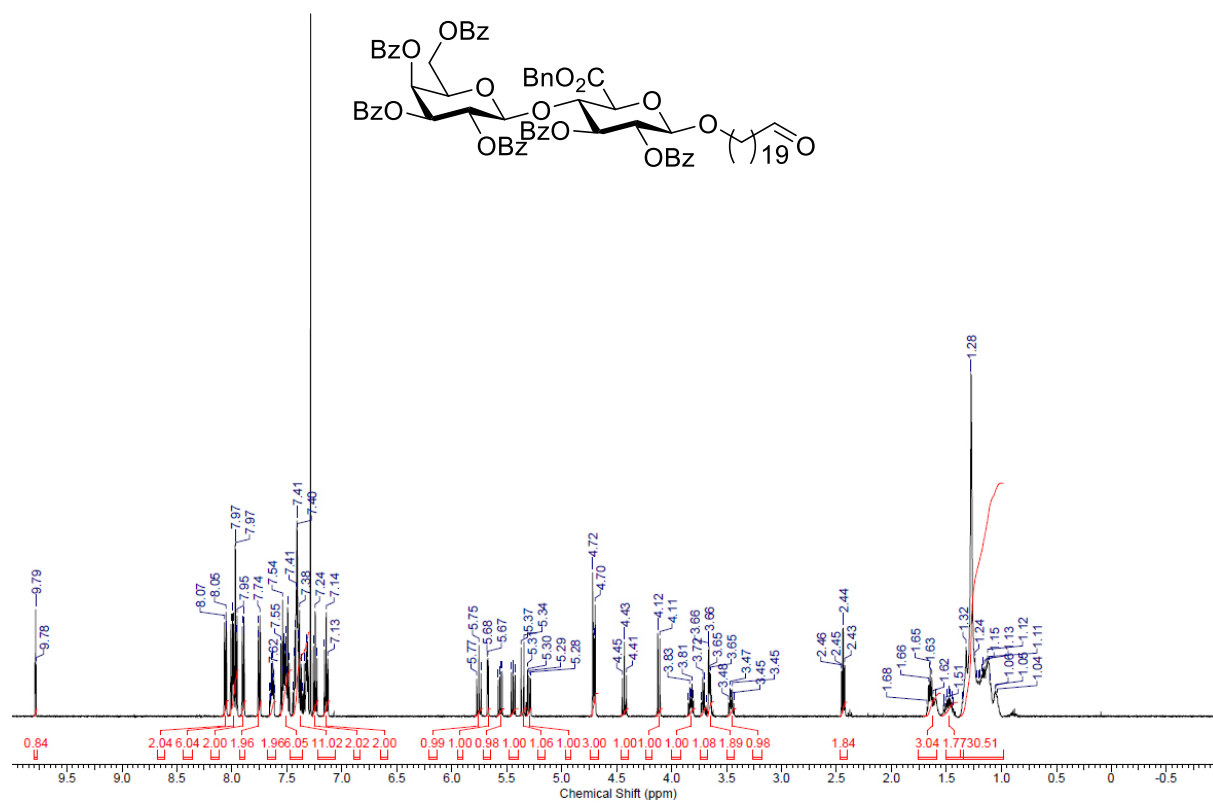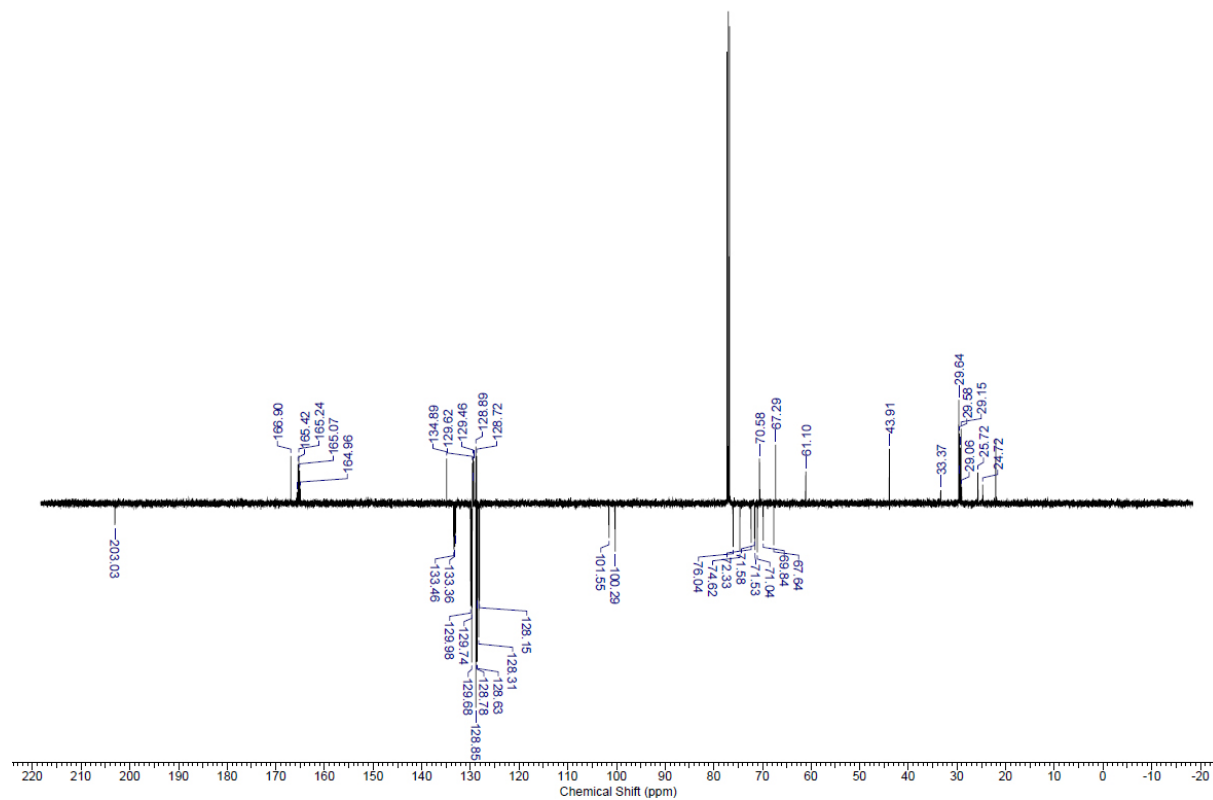

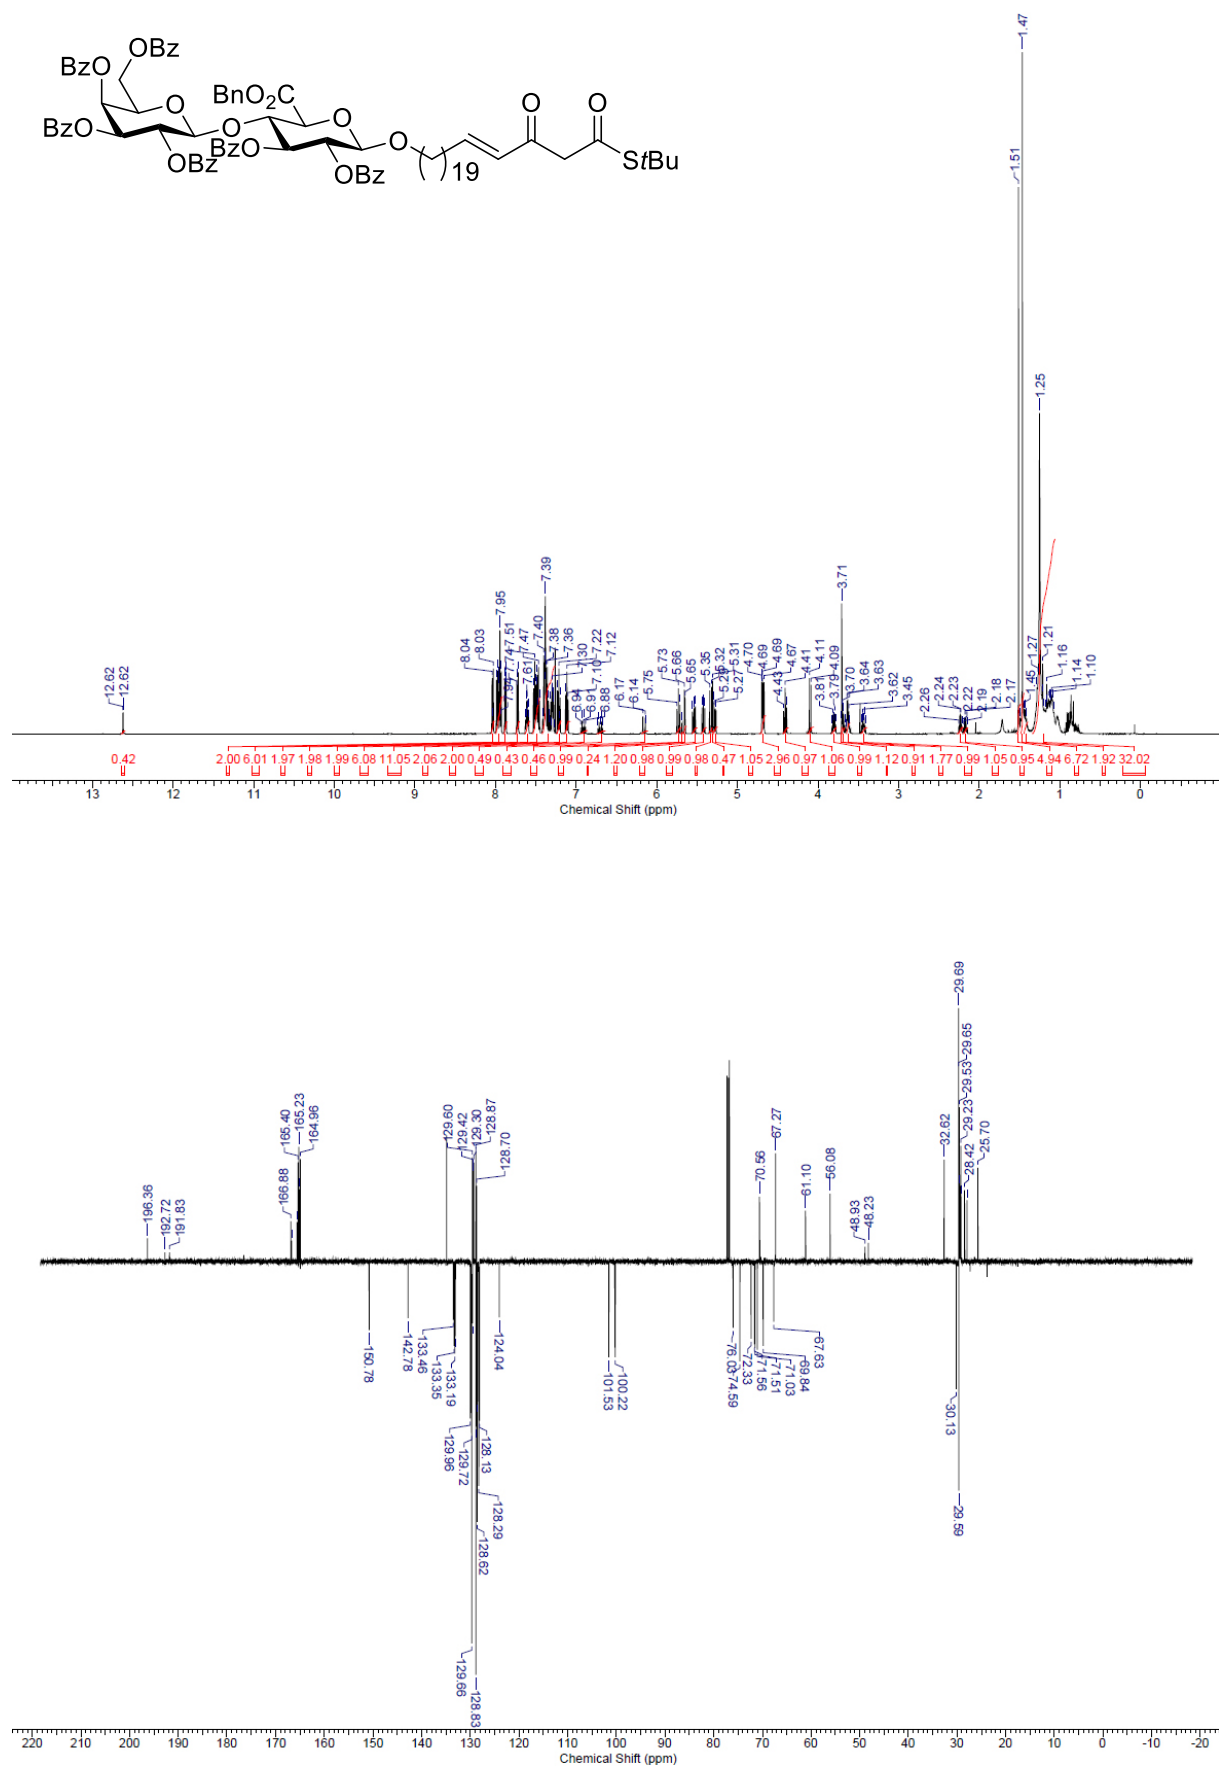



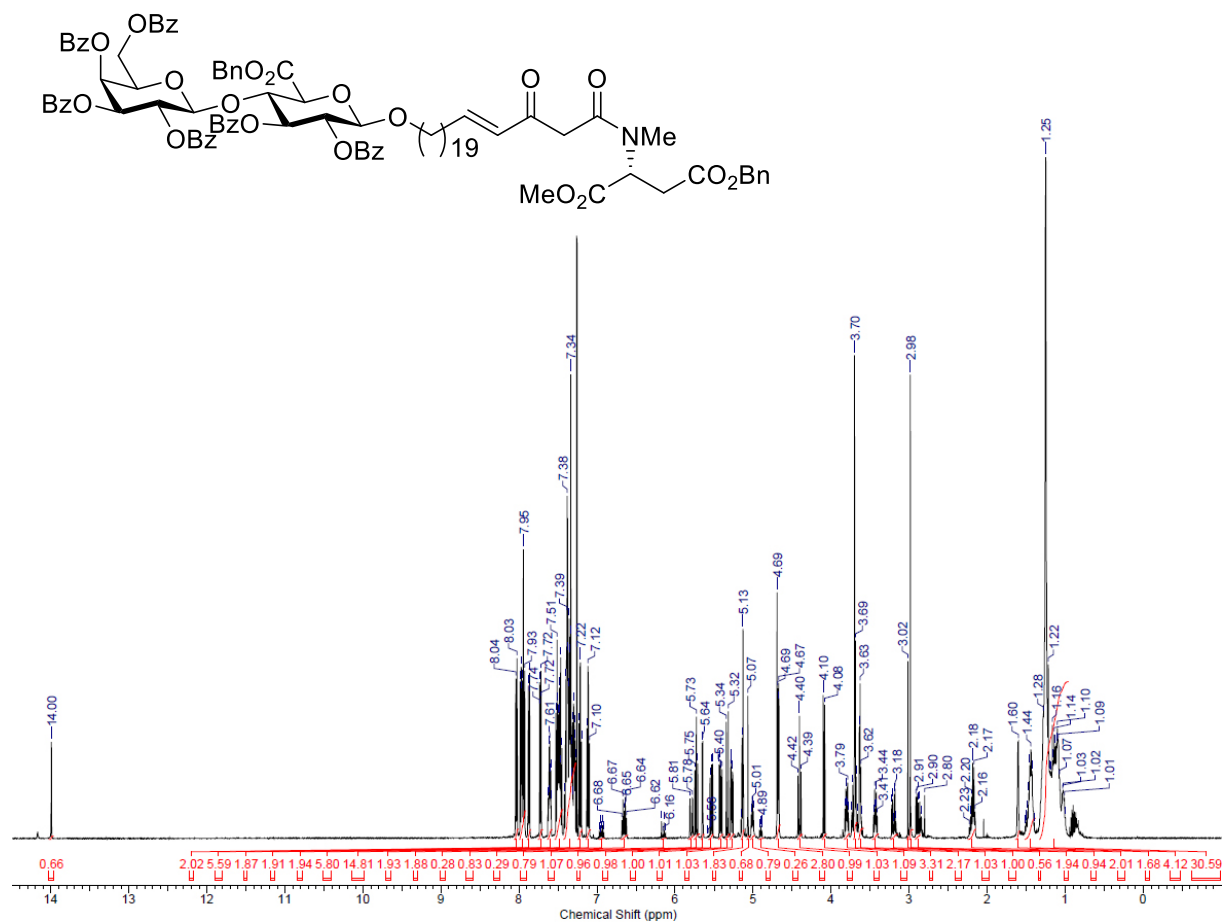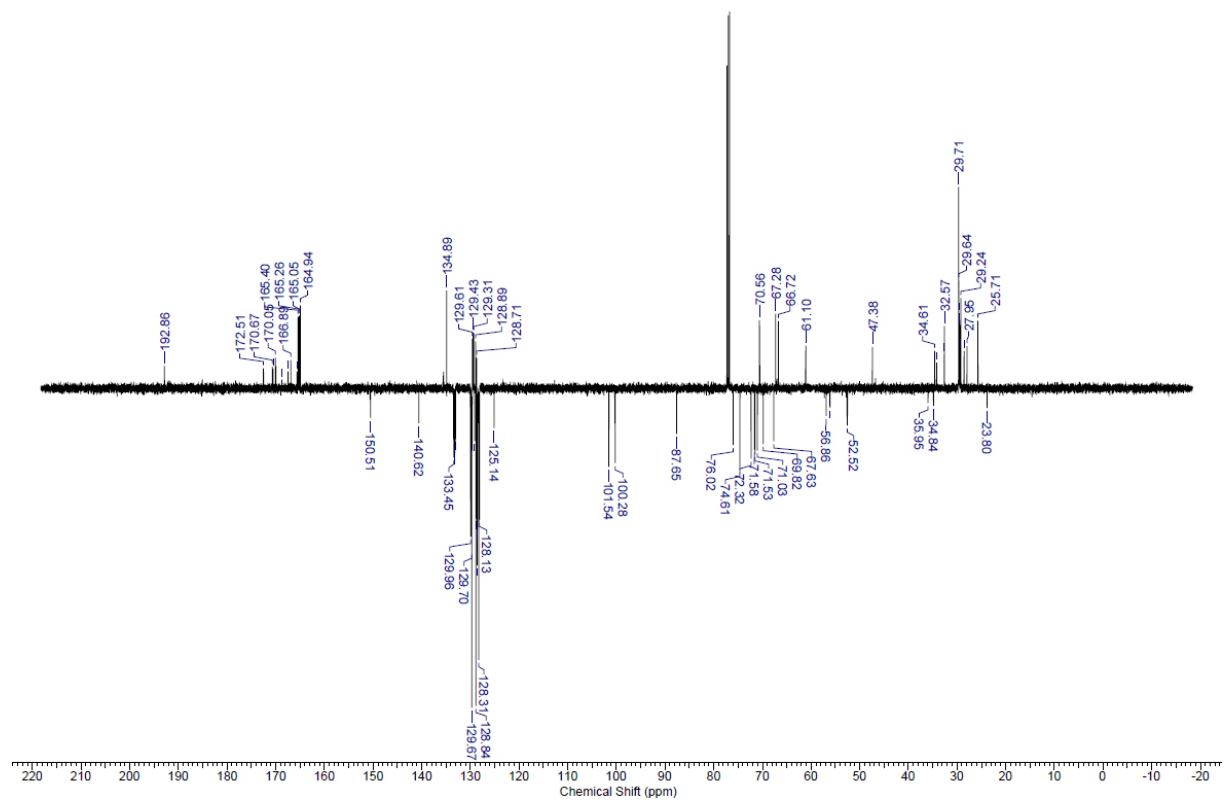

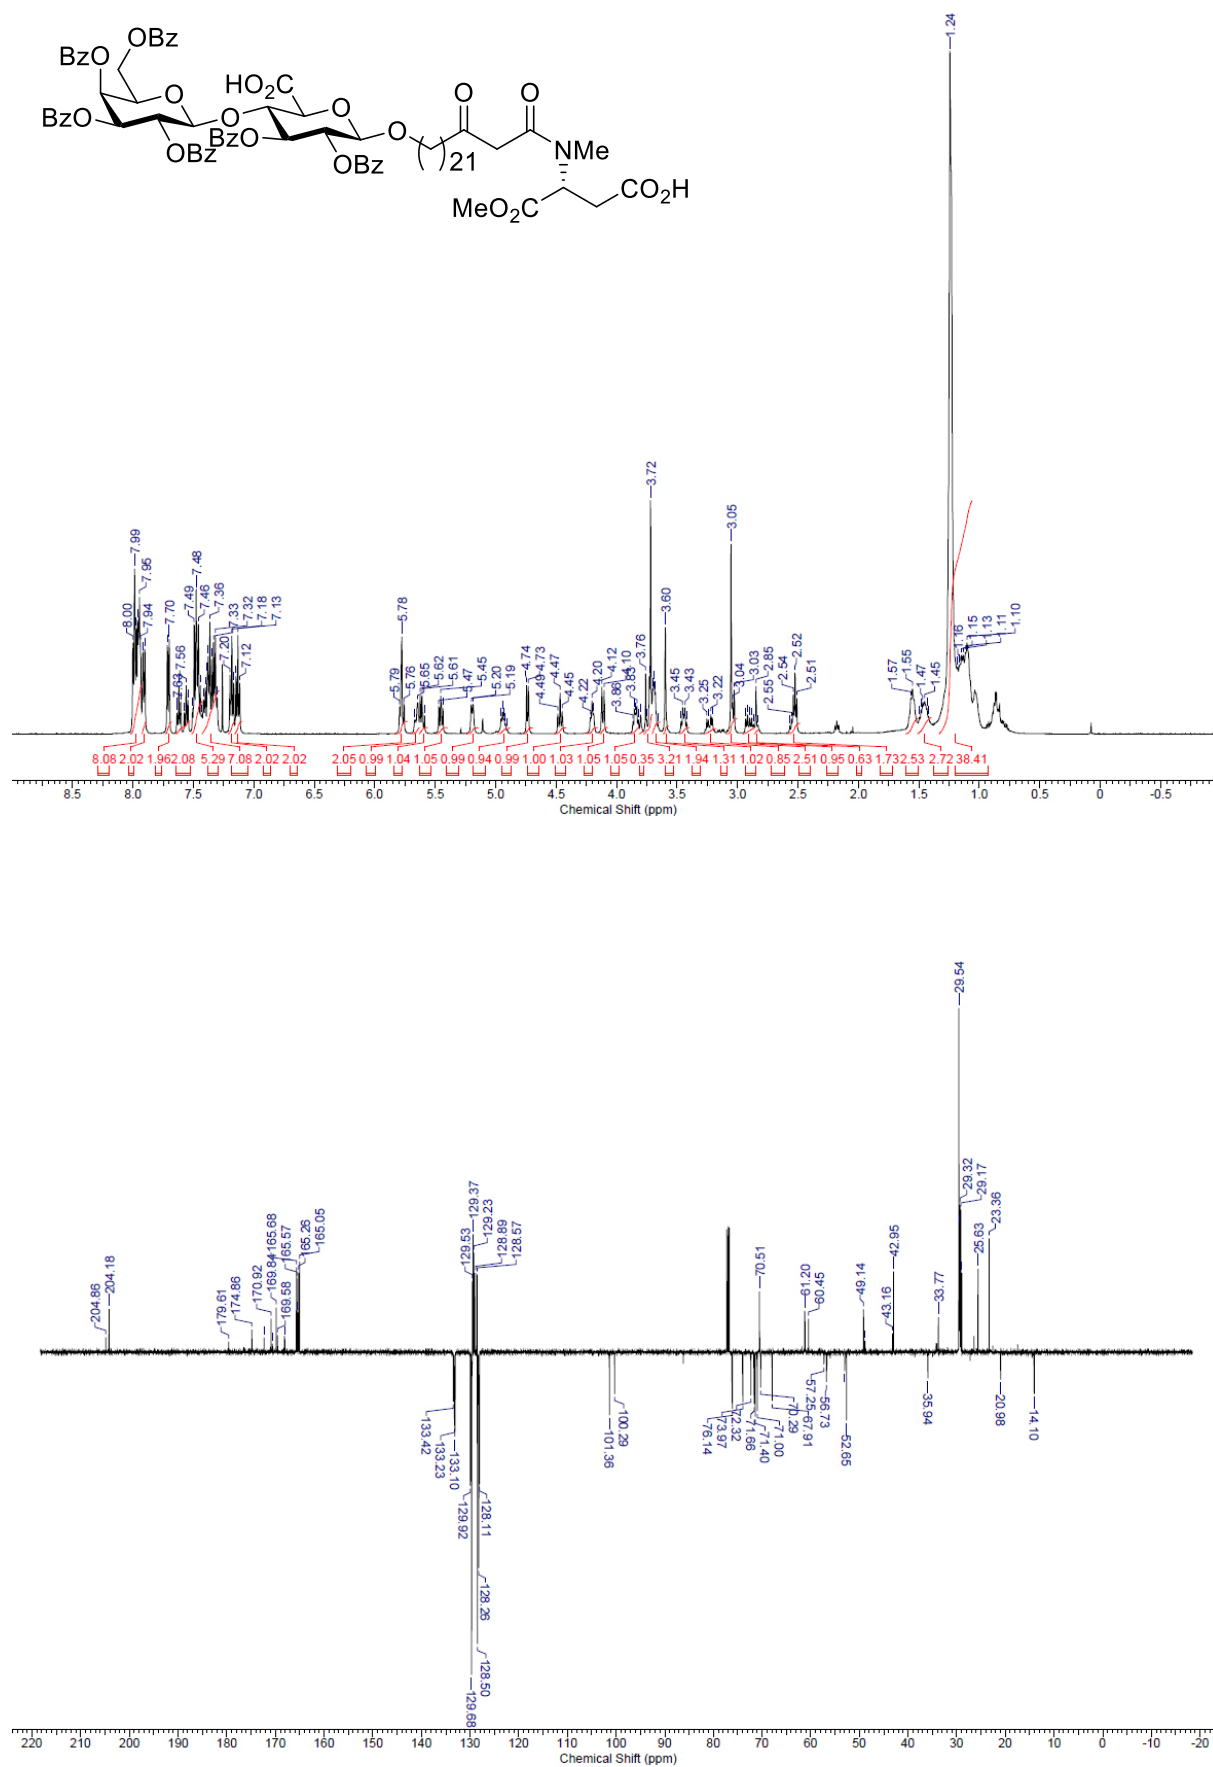

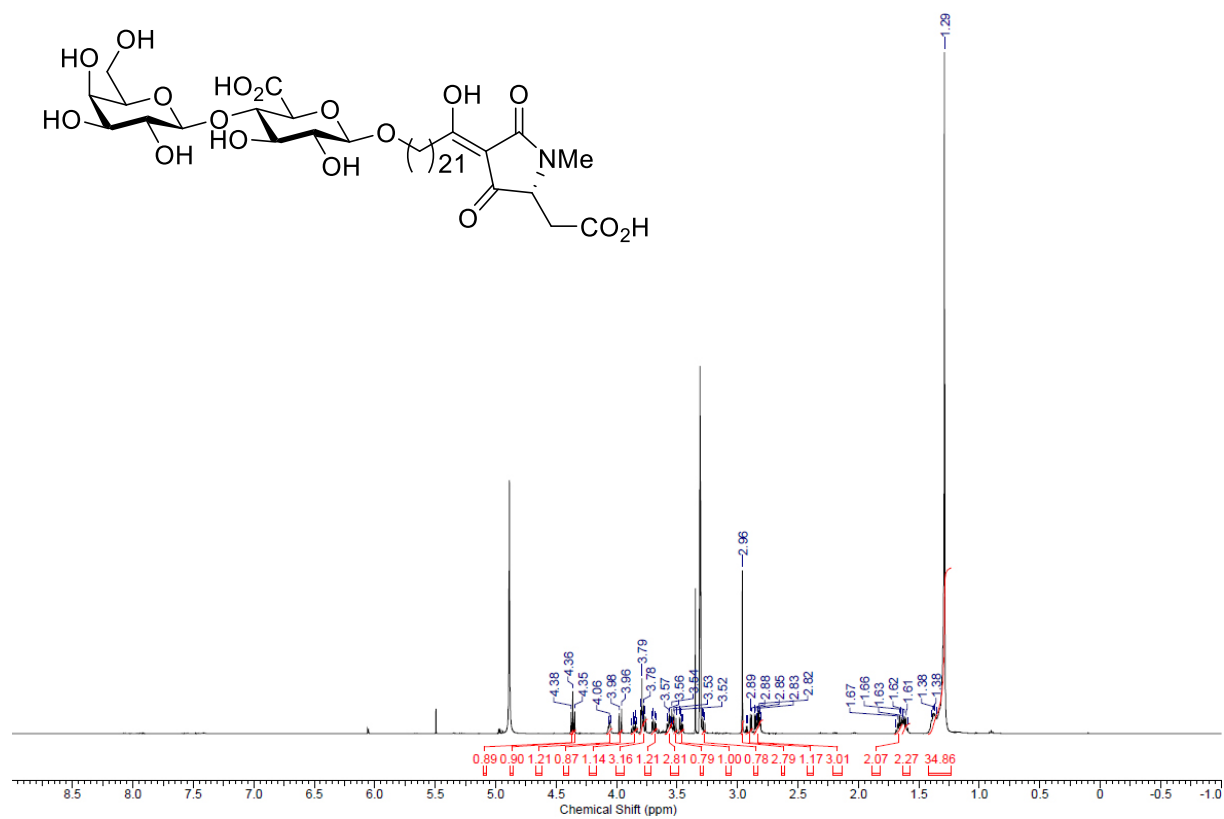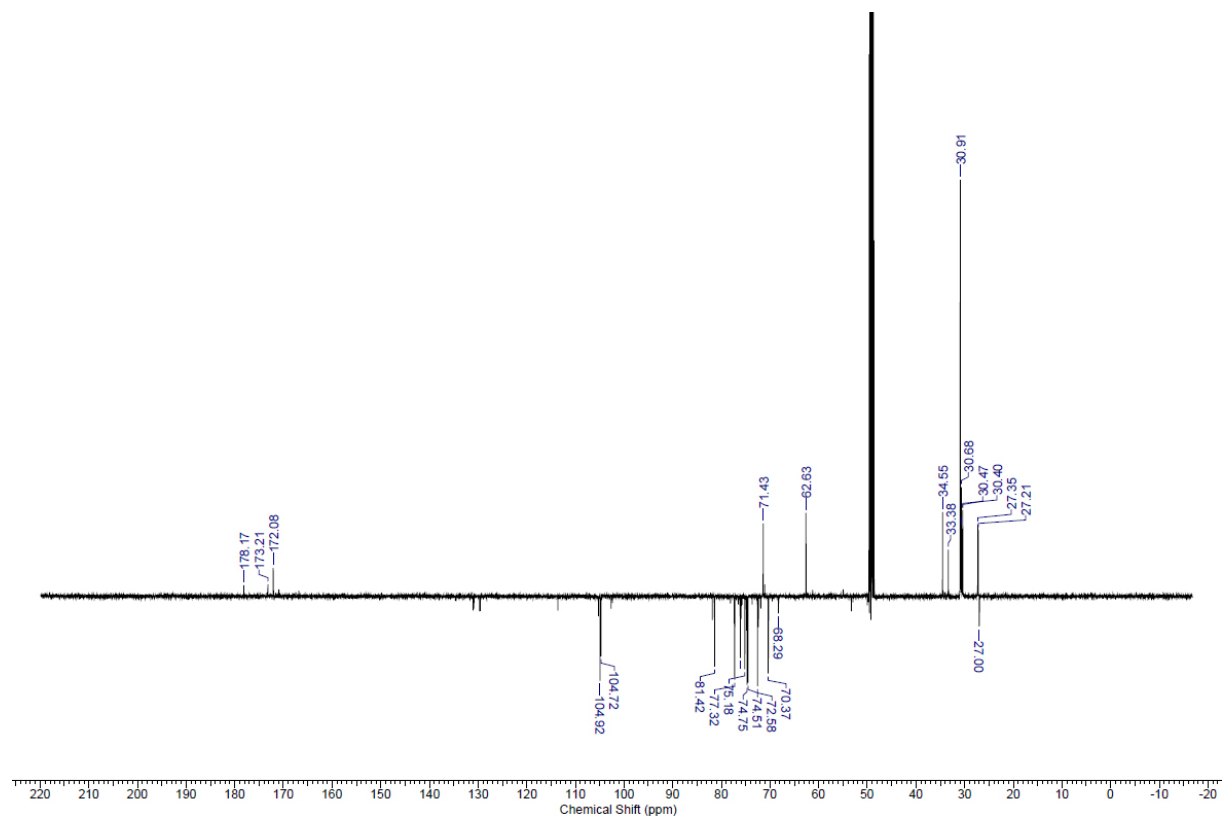

COSY of **2**

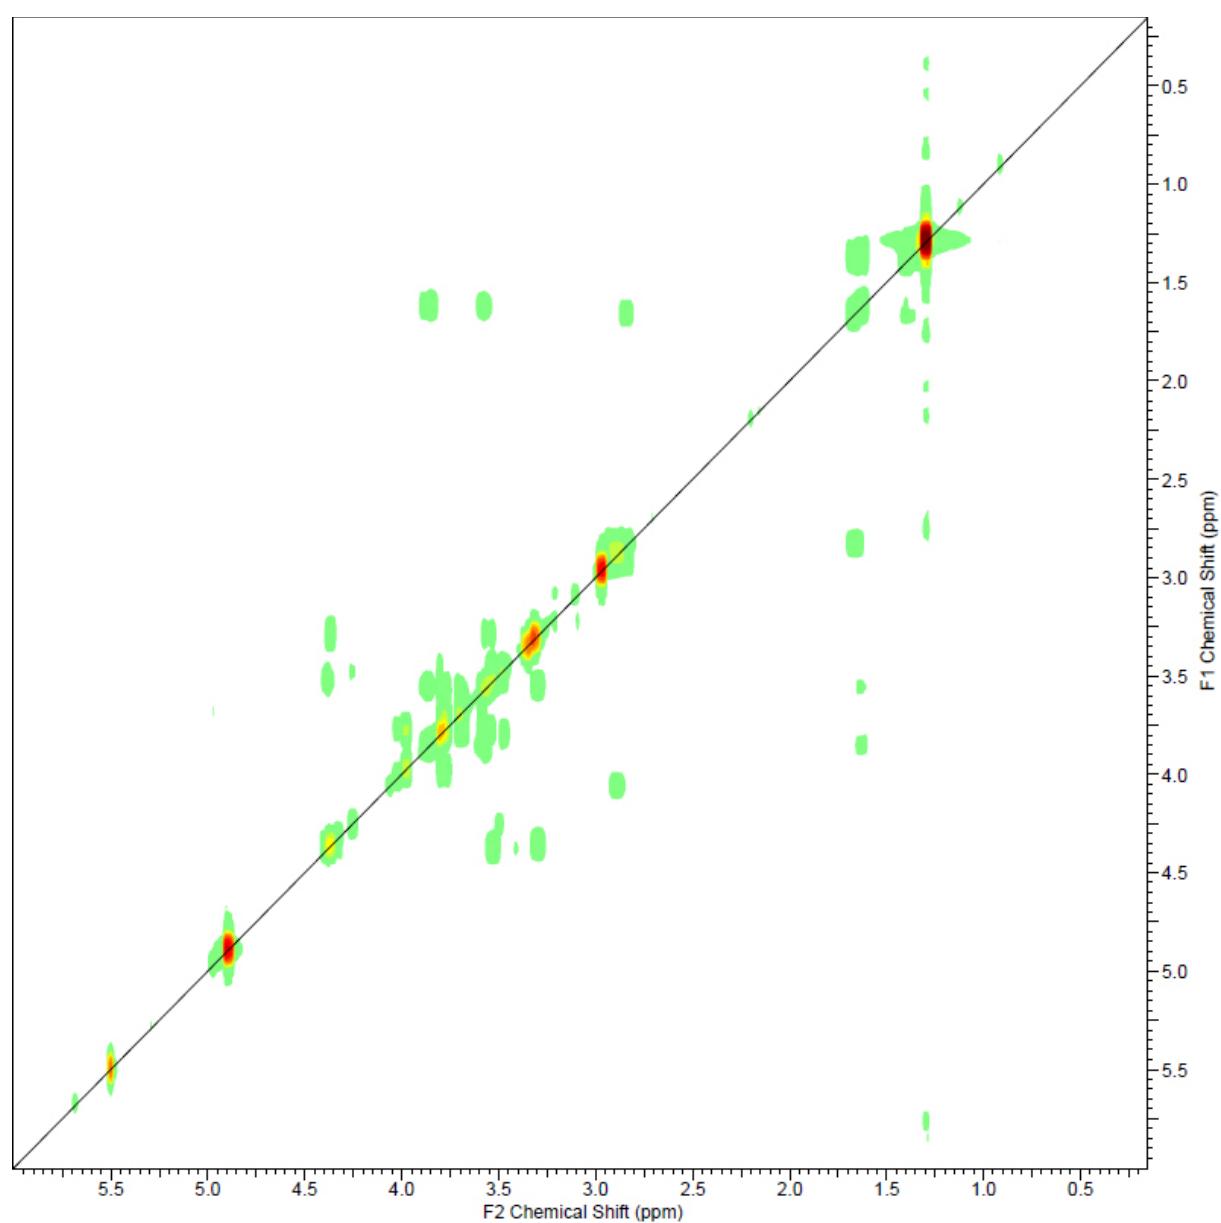

HSQC of **2**

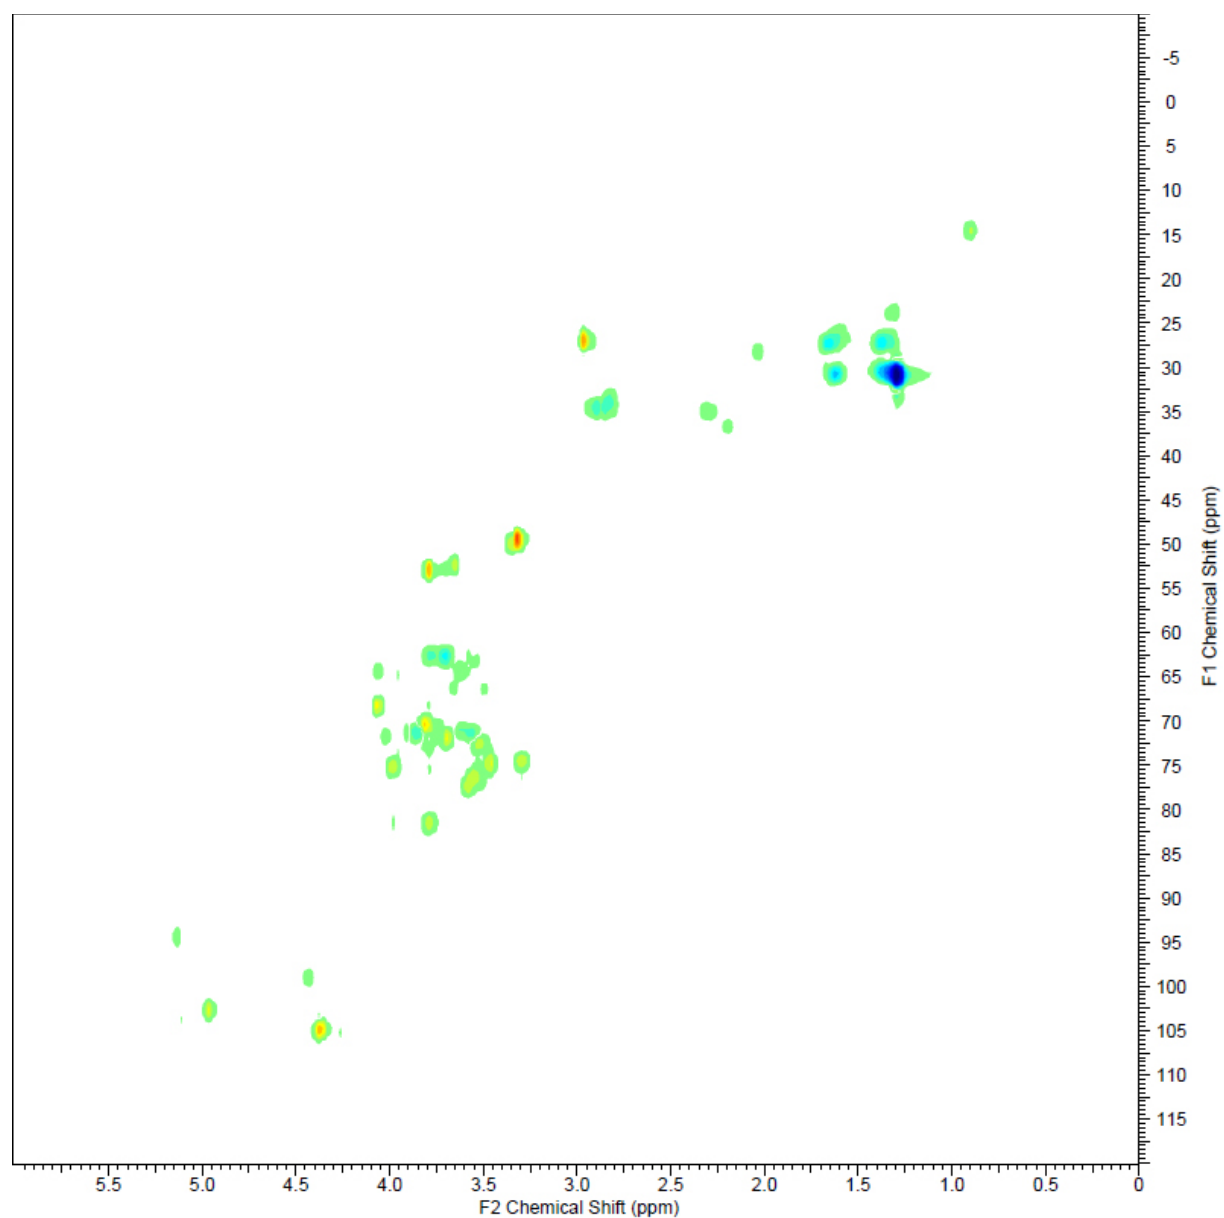

# HMBC of 2

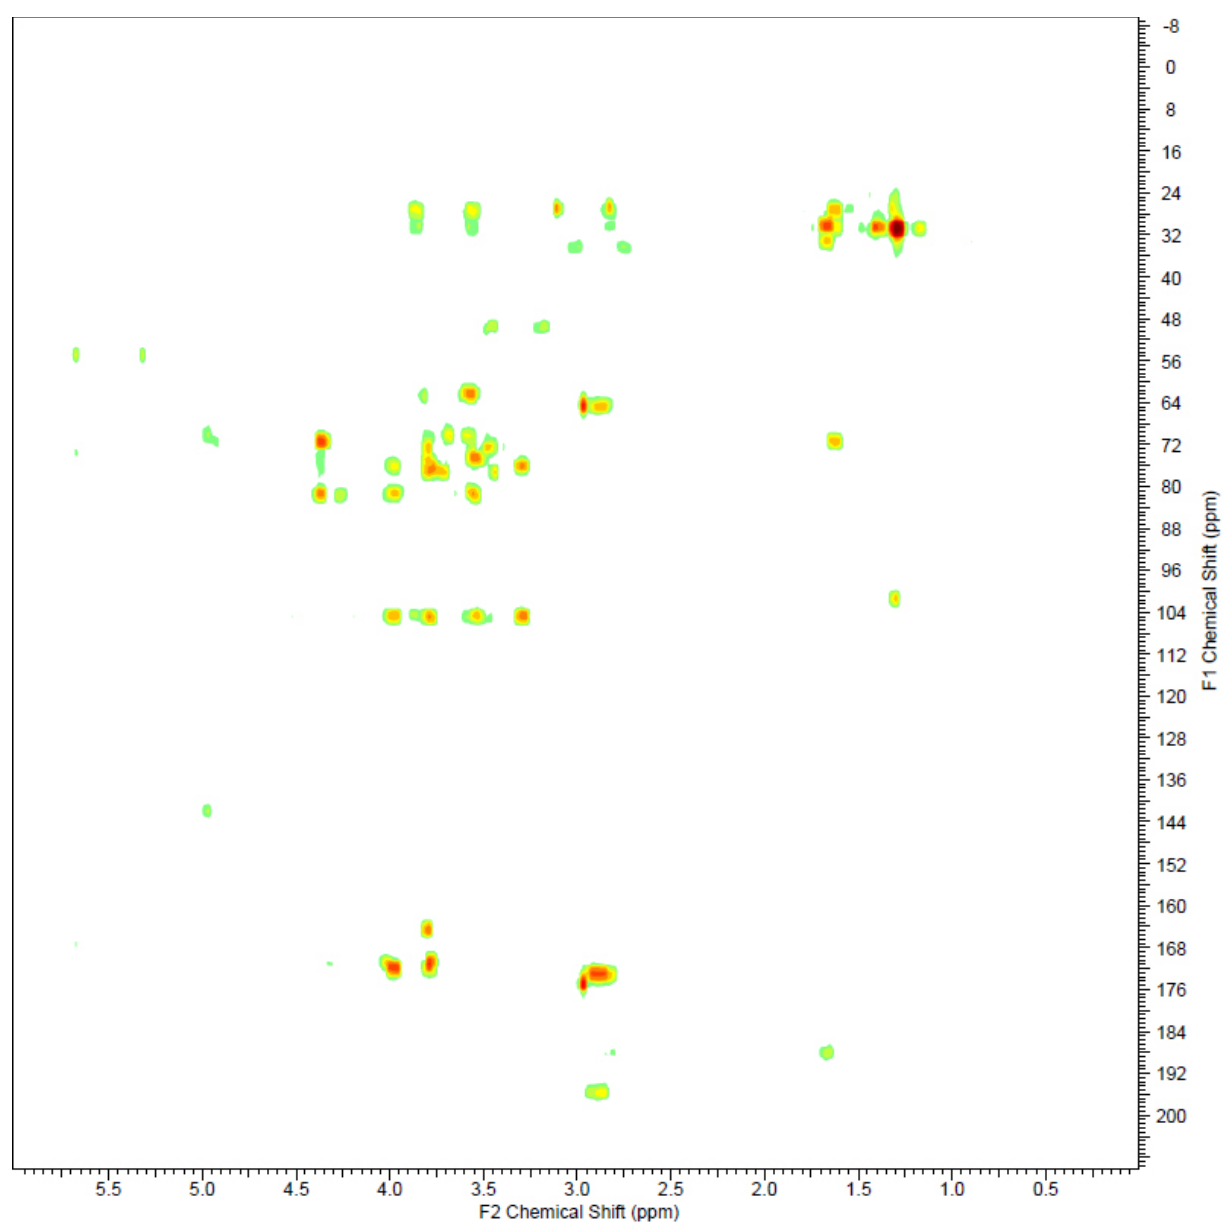

## HPLC chromatogram of **2**

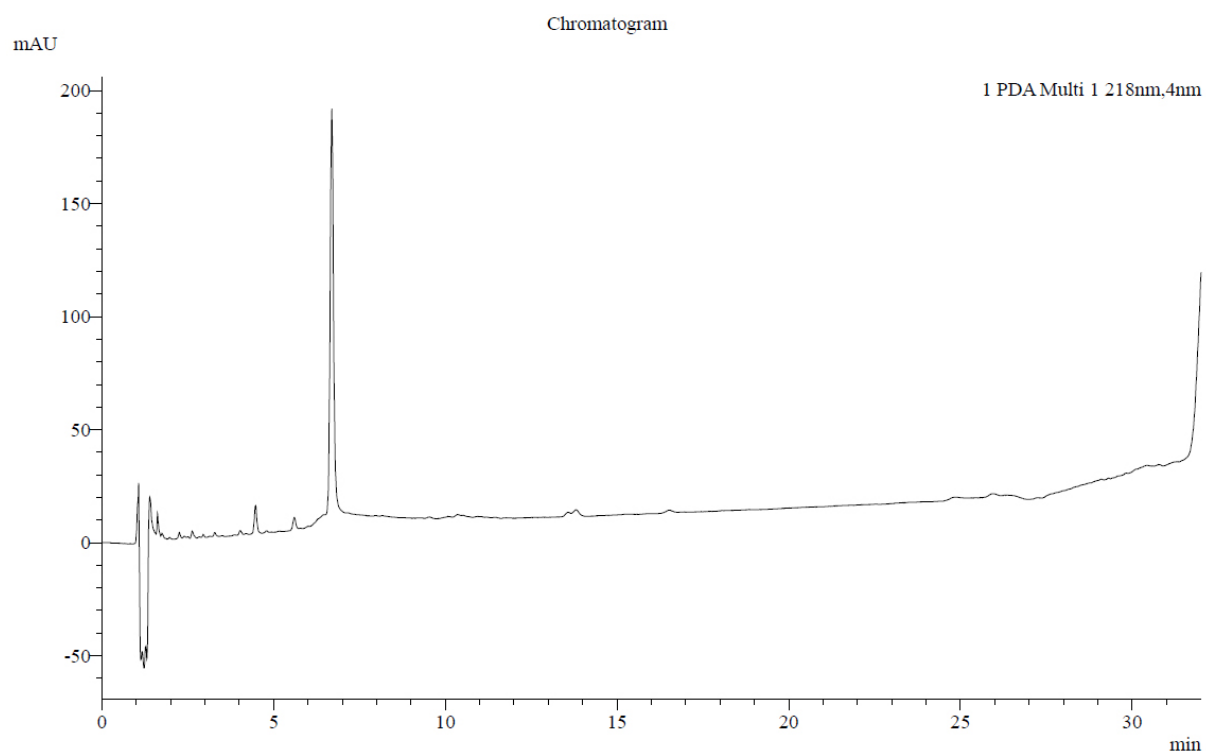

HPLC program: start at 70% MeCN in H<sub>2</sub>O with 0.1% HCOOH to 85% MeCN in 25 min for 5 min;  
Flow rate 1.0 mL/min, column: Knauer Eurospher II 100-3 C18, 150 x 4 mm

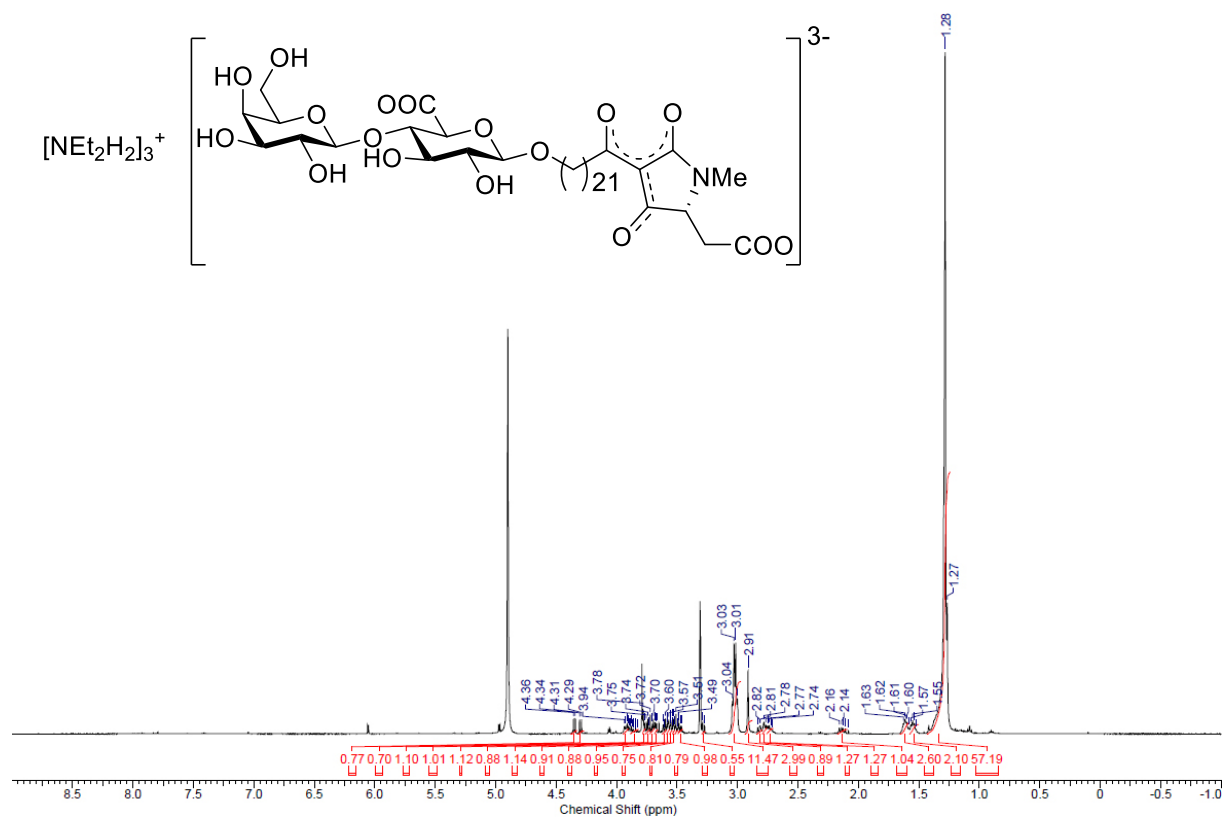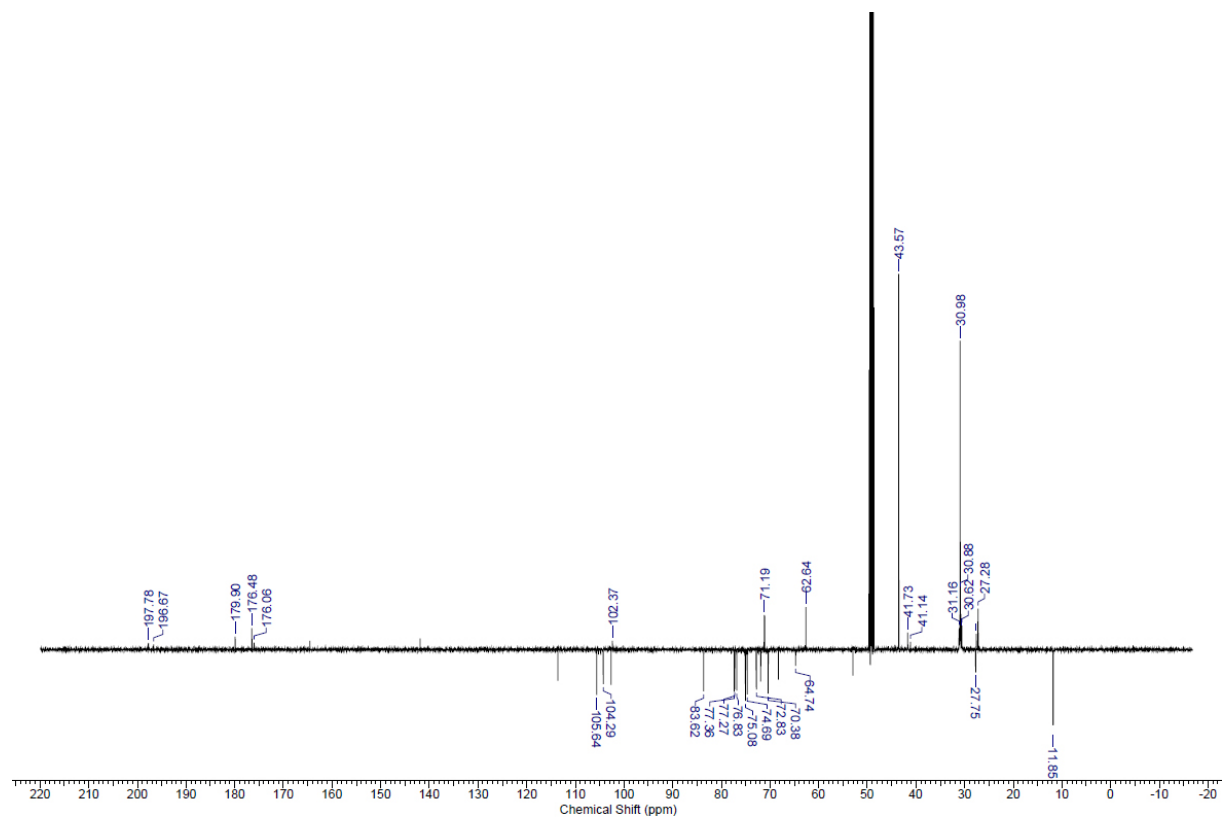



COSY of  $[\text{NEt}_2\text{H}_2]_3^+ [\mathbf{2-3H}]^{3-}$

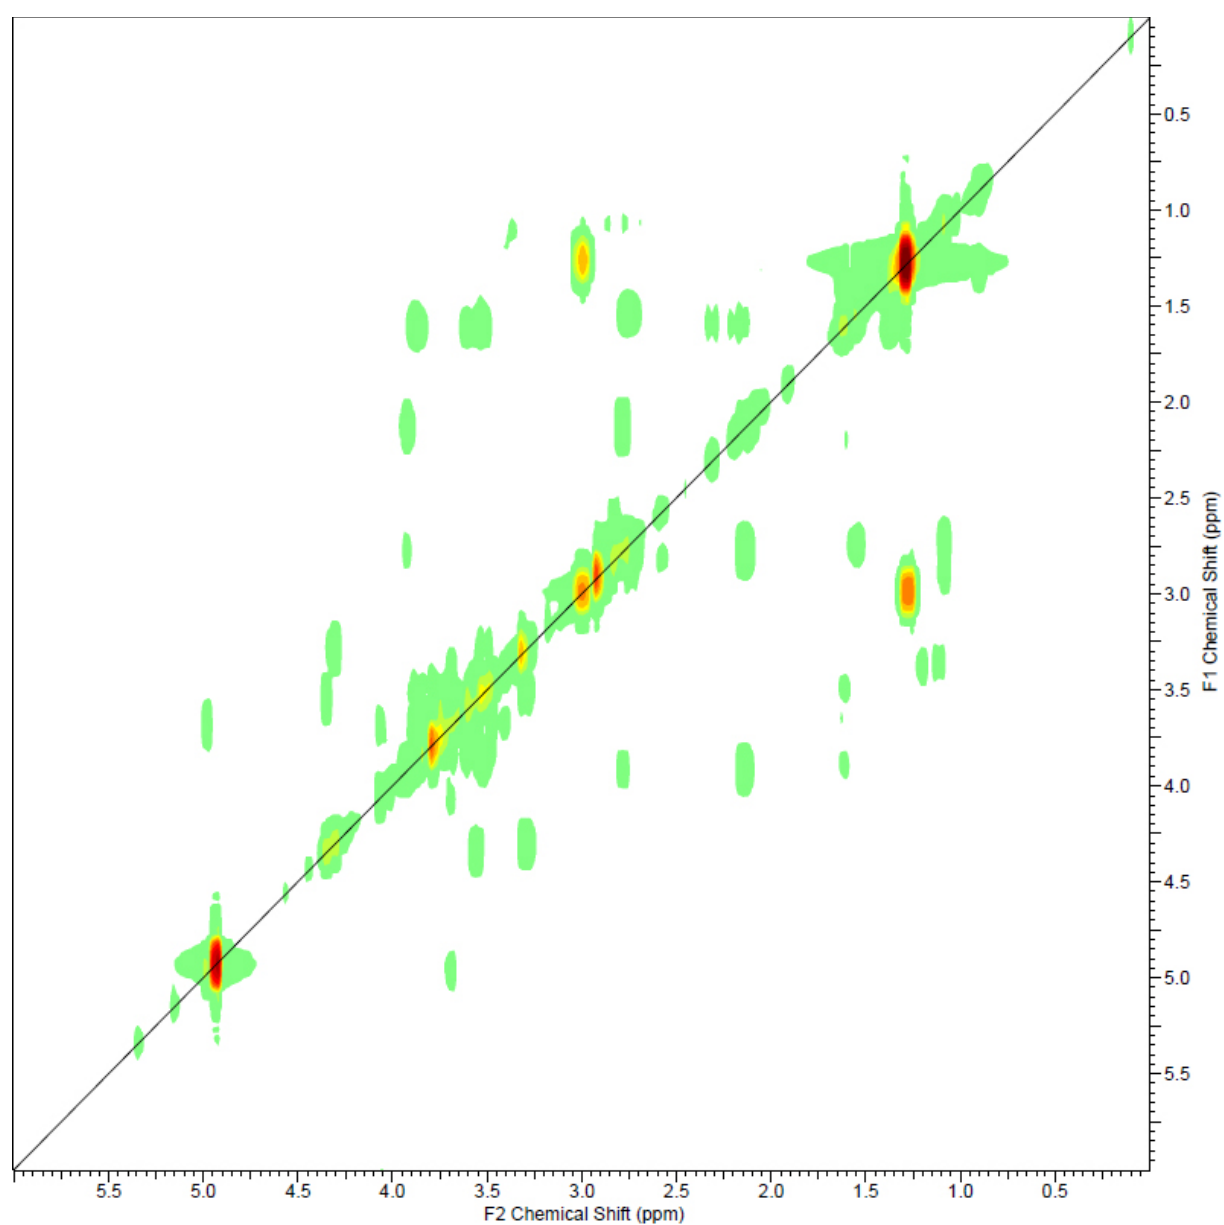

HSQC of  $[\text{NEt}_2\text{H}_2]_3^+ [\mathbf{2}\text{-}^3\text{H}]^{3-}$

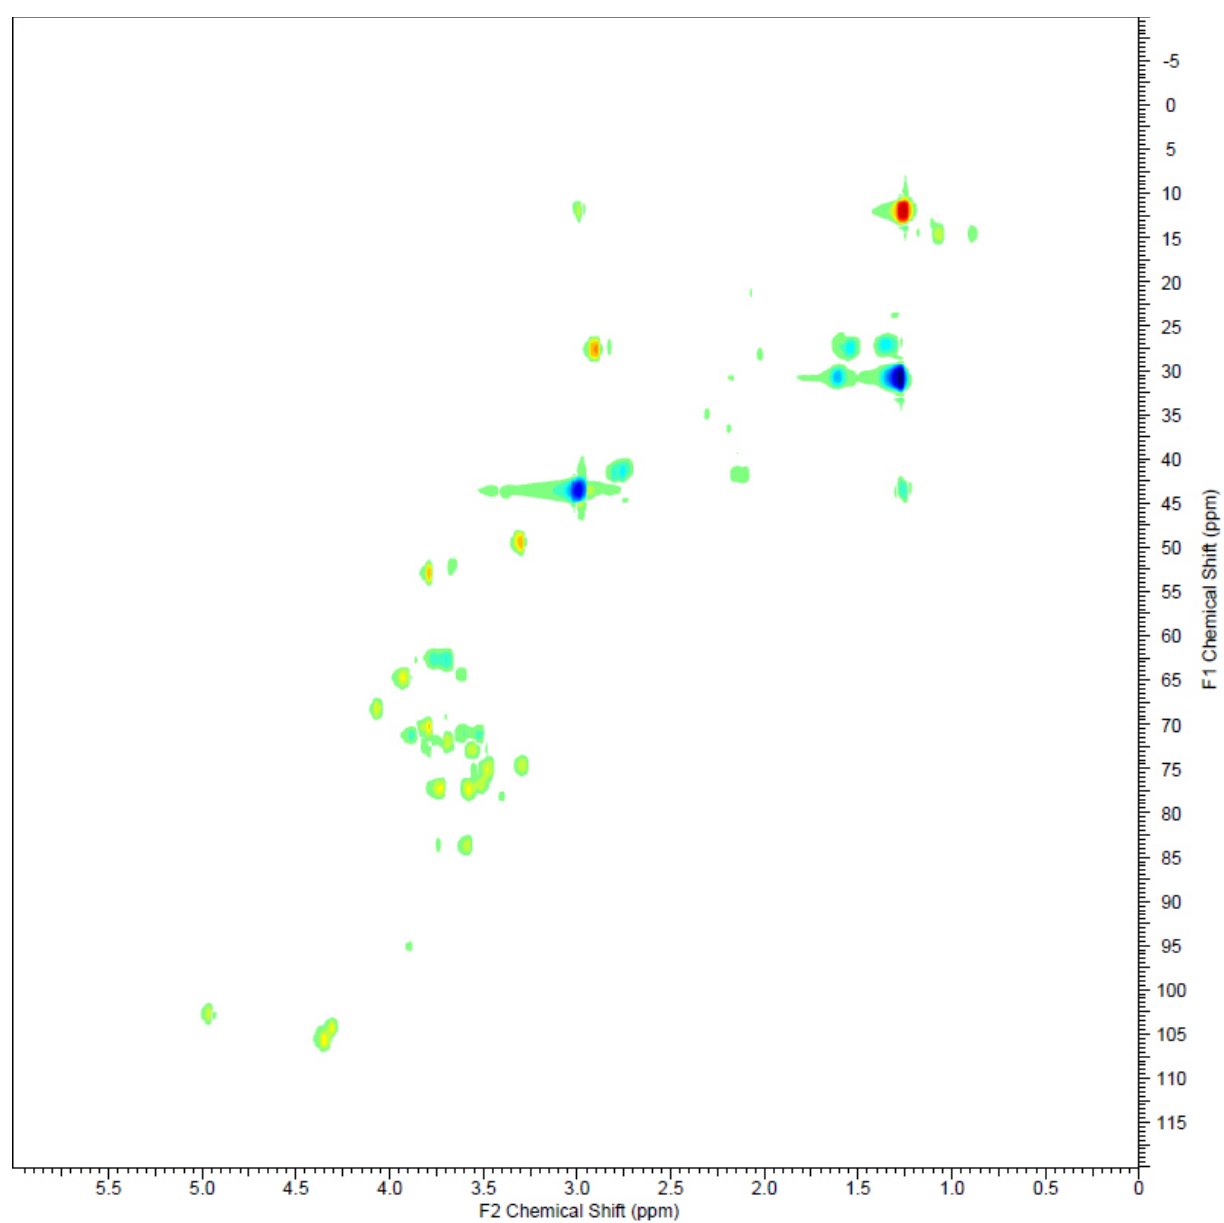

HMBC of  $[\text{NEt}_2\text{H}_2]_3^+ [\text{2-3H}]^{3-}$

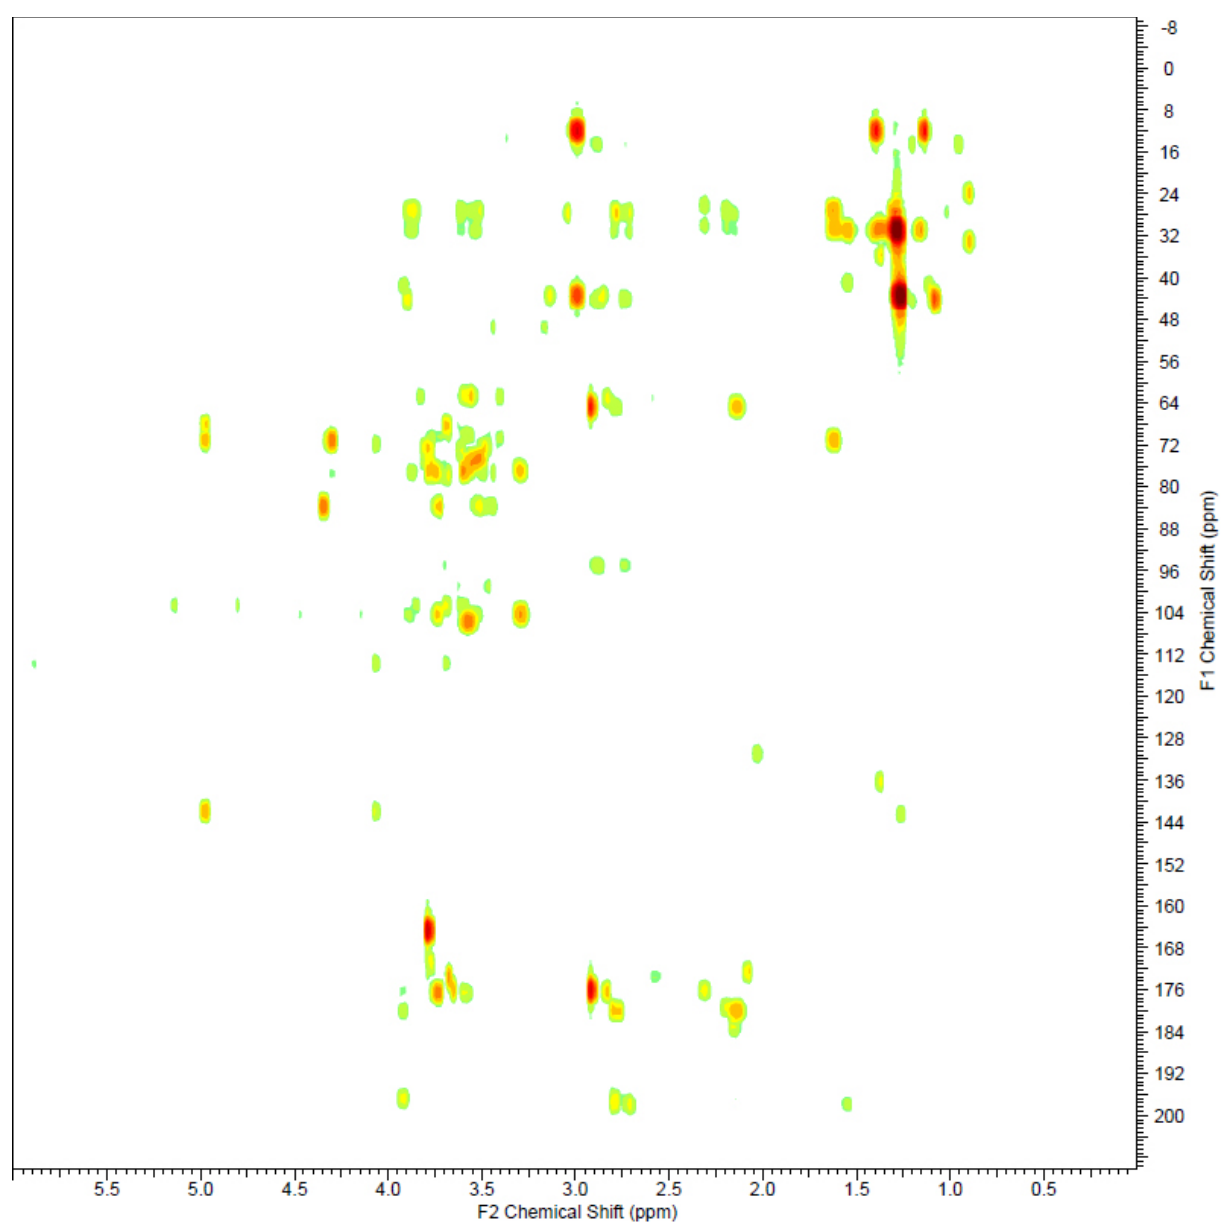

HPLC chromatogram of  $[\text{NEt}_2\text{H}_2]_3^+ [\mathbf{2-3H}]^{3-}$

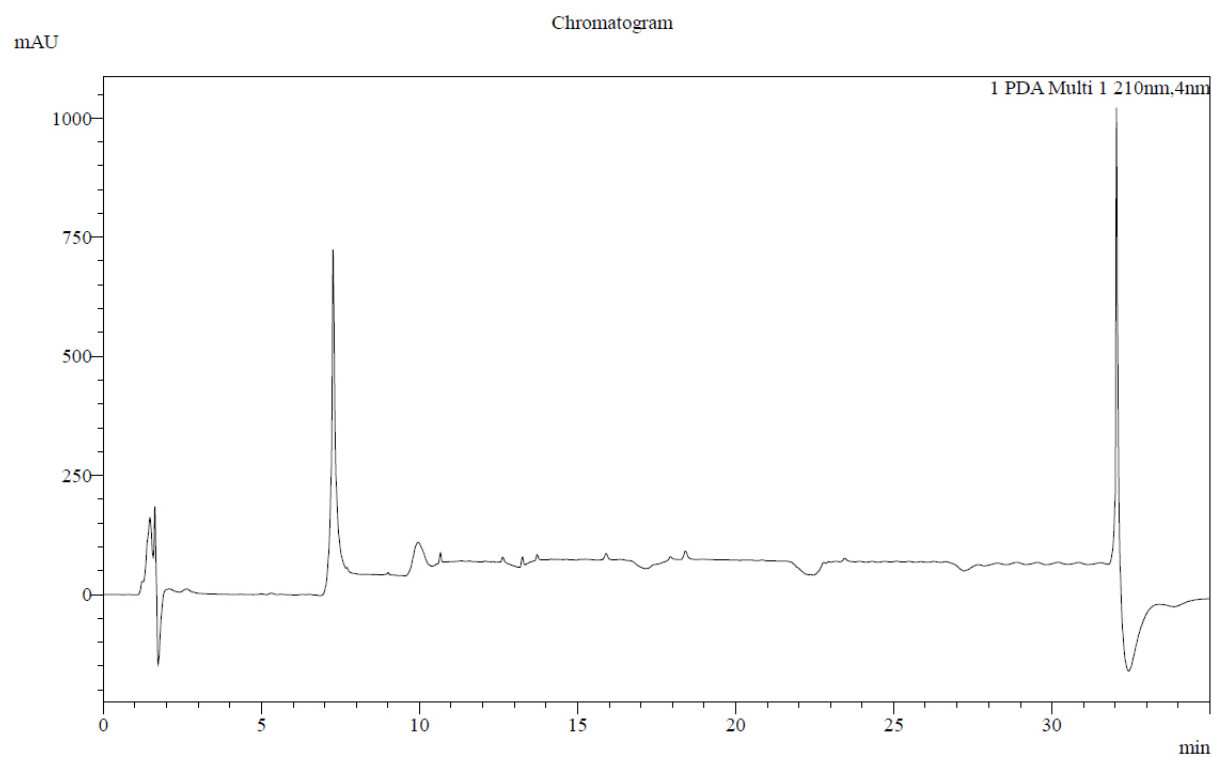

HPLC program: start at 40% MeCN in H<sub>2</sub>O to 95% MeCN in 25 min for 5 min;  
Flow rate 1.0 mL/min, column: Knauer Eurospher II 100-3 C18, 150 x 4 mm

## HRMS of ancorinoside B (2)

Analysis without HPLC-column, full scan mode 80-1200 amu, iso80: isocratic with 80% MeCN

ESI positive:

C:\Xcalibur\data\210325kso49opo

03/26/21 12:51:28

KS496\_5 C41H69NO17 ESI+

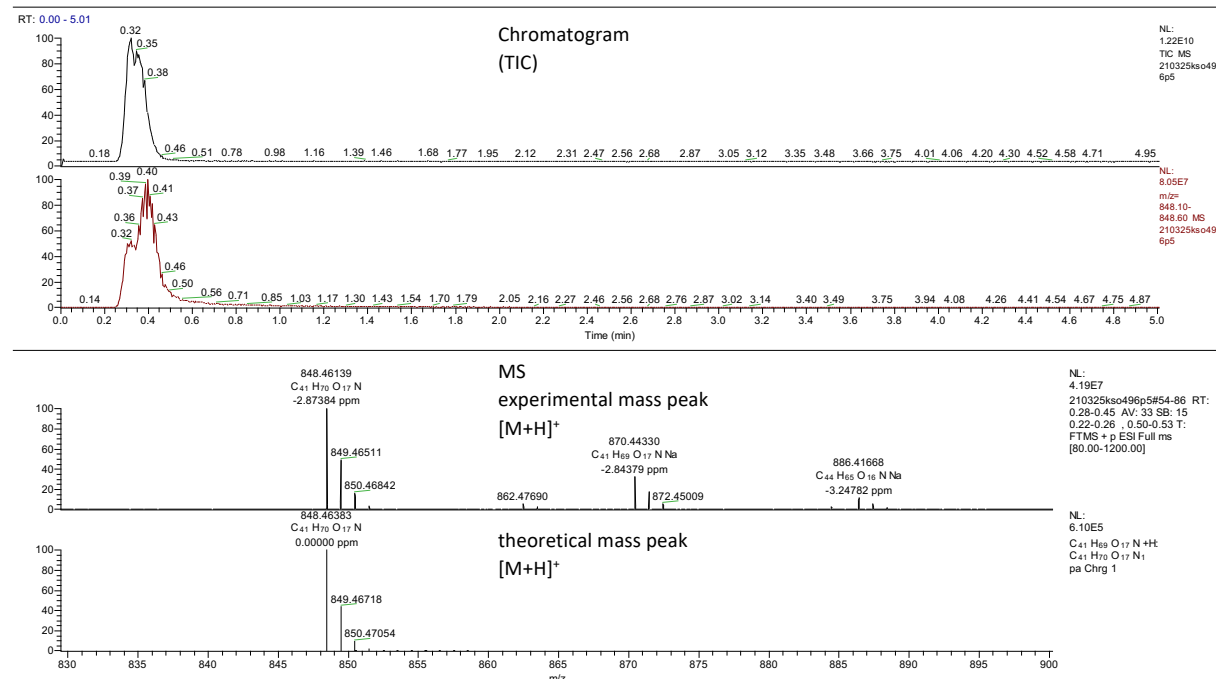

ESI negative:

C:\Xcalibur\data\210325kso49opo

03/25/21 15:45:47

KS496\_5 C41H69NO17 ESI-

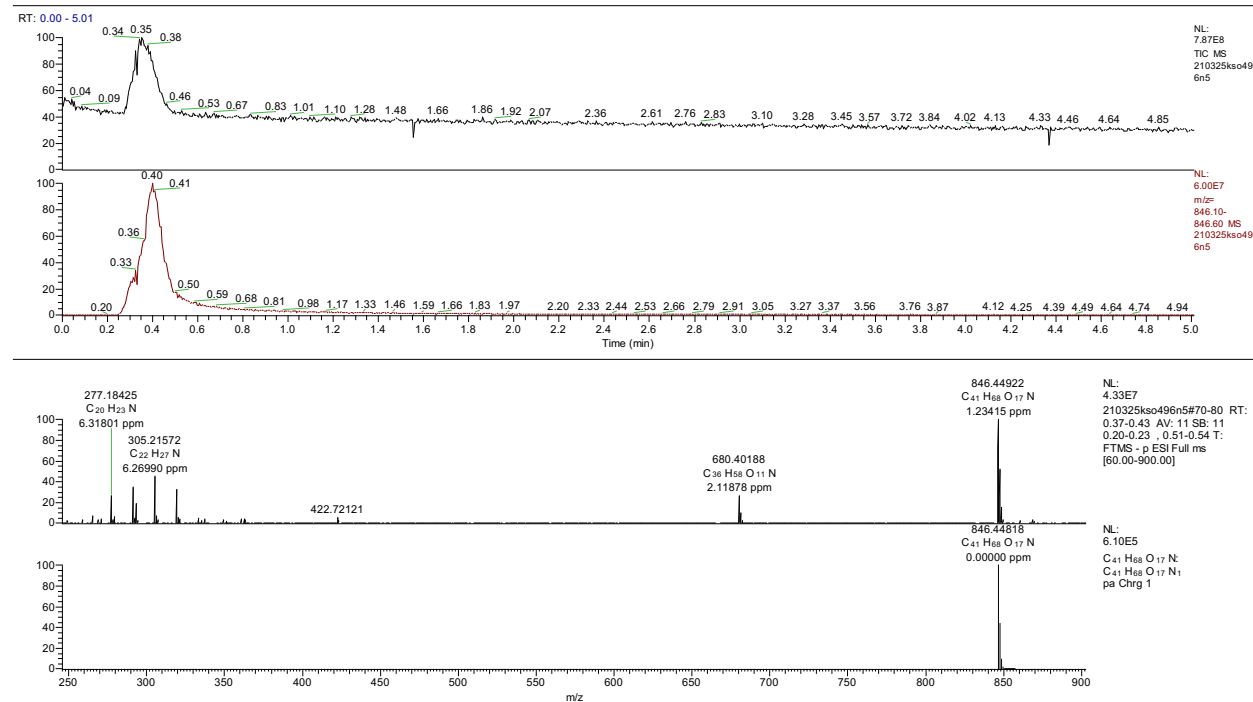

Analysis with HPLC-column (Accupore RP-MS 150 x 2.1 mm, 2.6  $\mu$ m), full scan mode 100-1500 amu, gradient from 40% to 90% MeCN

## ESI positive

C:\Xcalibur\data\210325kso49opo\_col4

03/26/21 13:41:38

KS496\_5 C41H69NO17 col4 ESI+

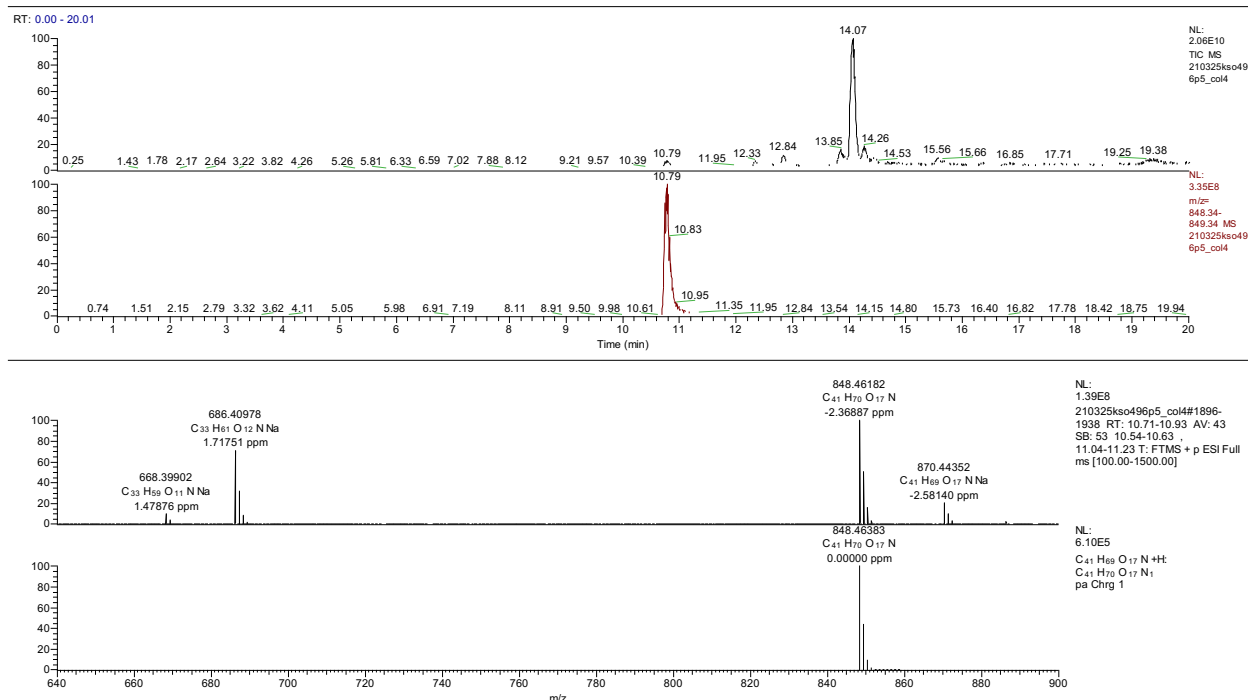

## ESI negative

C:\Xcalibur\data\210325kso49opo\_col4

03/25/21 16:48:16

KS496\_5 C41H69NO17 col4 ESI-

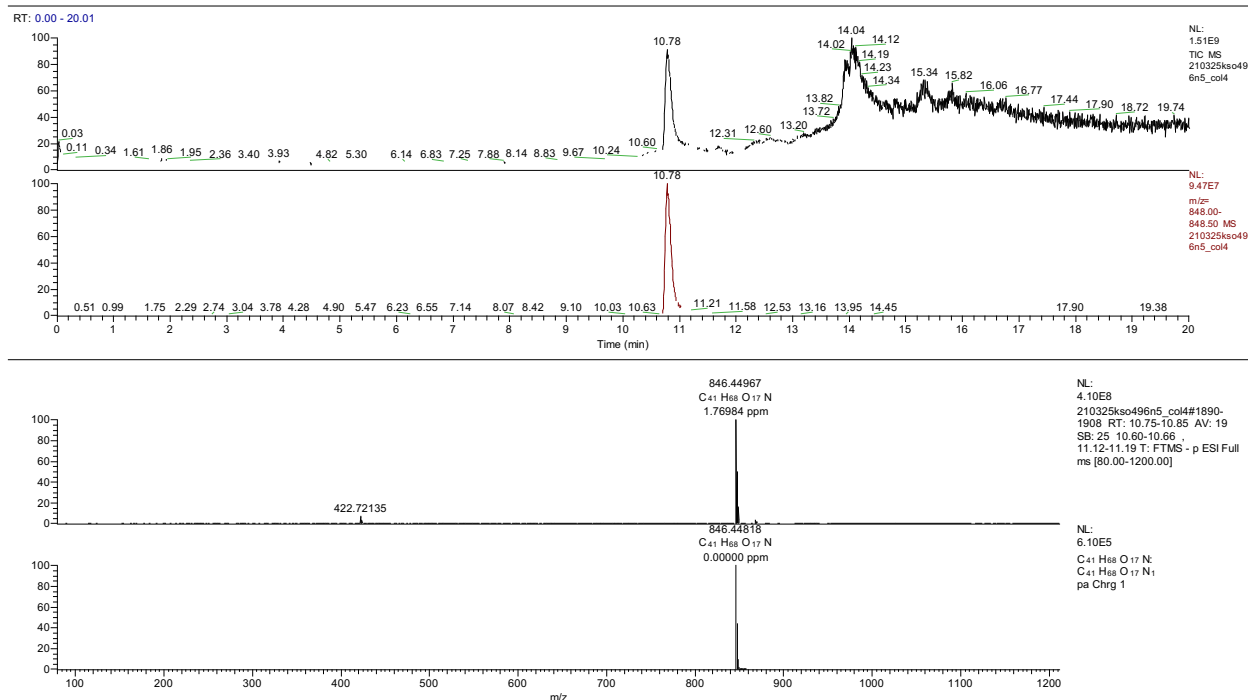

## HRMS of 8

C:\Xcalibur\data\210309\kso48o

03/09/21 10:42:30

KS 486

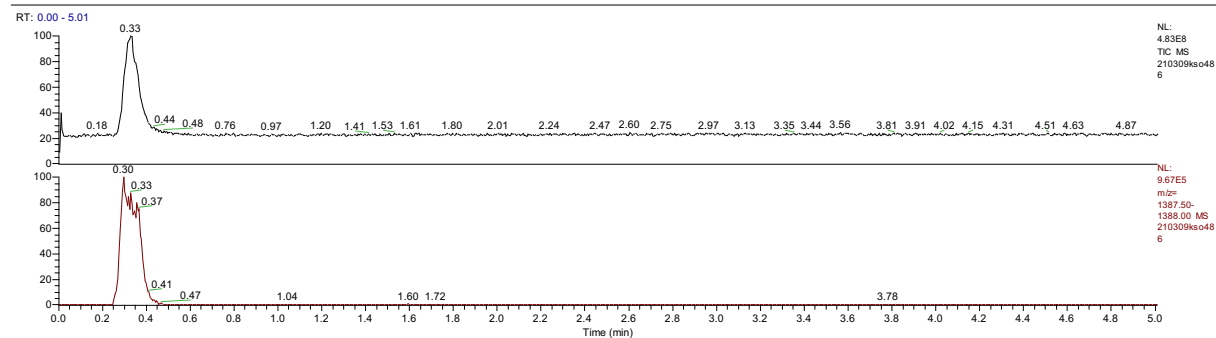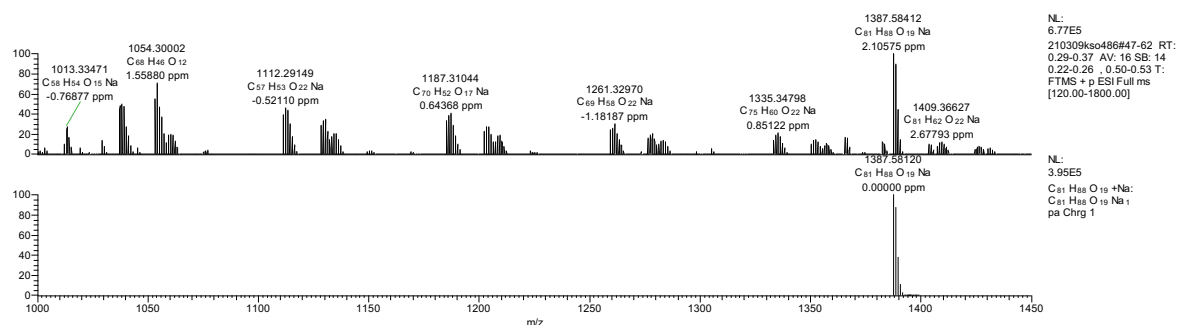

## HRMS of 6

C:\Xcalibur\data\210305\_kso\_483\_2

03/05/21 14:52:47

KS 483 (col2iso95)

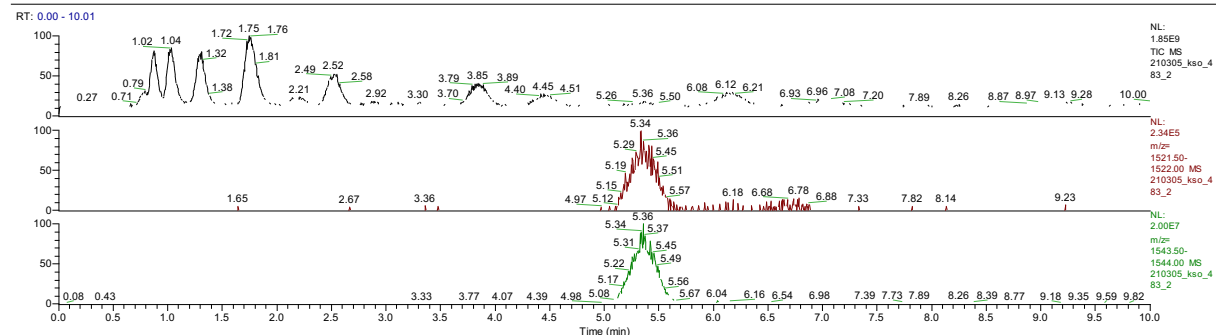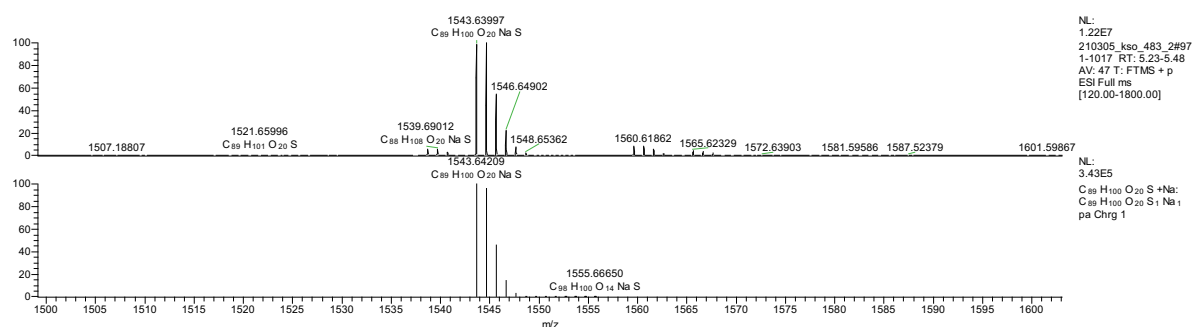

# HRMS of 5

C:\Xcalibur\data\210528kso519

05/28/21 10:43:25

KS519

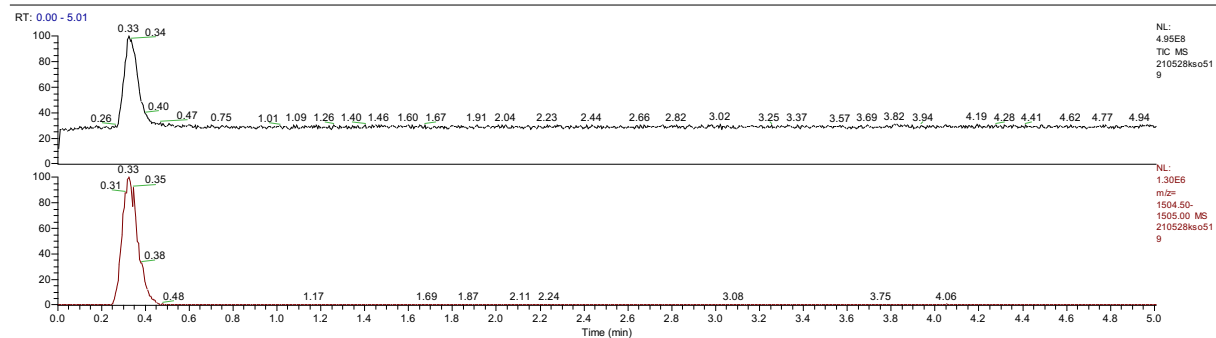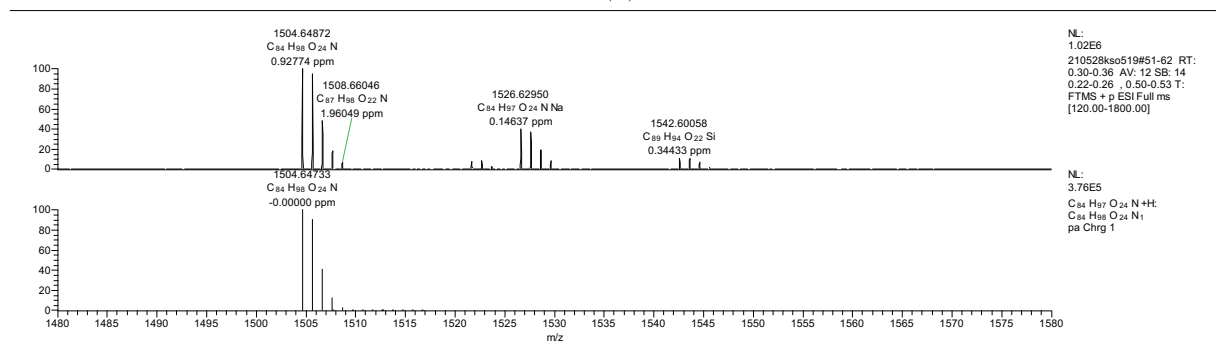



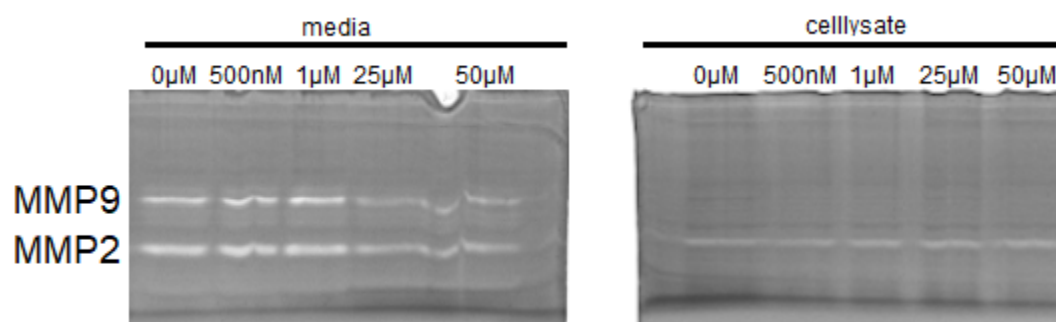

**Figure S1.** Effect of ancorinoside B (**2**) (500 nM, 1 μM, 25 μM, and 50 μM) on the cell-associated and secreted activities of MMP-2 and MMP-9 in 518A2 melanoma cells after 24 h exposure. Cell lysate and media samples were subjected to gelatin zymography. Control (DMSO)-treated probes are listed as 0 μM. Images are representative of two independent experiments.
